# Supplementary material for: A comparative analysis of the epidemiology of influenza and respiratory syncytial virus in Russia, 2013/14 to 2018/19
Source: PubMed Central journal article supplement (PMC8818296; doi:10.7189/jogh.12.04009), 2022-02-05

1 **Table S1.** Number of polyclinics (primary care level) and infectious disease hospitals (secondary care  
 2 level) included in each respiratory viral surveillance site.

| City                                  | Primary care level                          | Secondary care level                                                            |
|---------------------------------------|---------------------------------------------|---------------------------------------------------------------------------------|
| <b>North-Western Federal District</b> |                                             |                                                                                 |
| Kaliningrad                           | 1 adult polyclinic<br>1 children polyclinic | 1 adult infectious disease hospital<br>1 children infectious disease hospital   |
| Saint Petersburg                      | 1 polyclinic (children and adults)          | 1 adult infectious disease hospital<br>1 children infectious disease hospital   |
| <b>Central Federal District</b>       |                                             |                                                                                 |
| Lipetsk                               | 1 adult polyclinic<br>1 children polyclinic | 1 infectious disease hospital (children and adults)                             |
| <b>Far-Eastern Federal District</b>   |                                             |                                                                                 |
| Chita                                 | 1 adult polyclinic<br>1 children polyclinic | 2 adult infectious disease hospitals<br>2 children infectious disease hospitals |
| Vladivostok                           | 1 adult polyclinic<br>1 children polyclinic | 1 adult infectious disease hospital<br>1 children infectious disease hospital   |
| Khabarovsk                            | 1 adult polyclinic<br>1 children polyclinic | none                                                                            |

3

4

5

6 **Table S2.** Positivity rate for influenza and RSV stratified by surveillance site, season, and level of  
7 care.

| Federal District | Site           | Season<br>(a) | Positivity rate influenza (%) |                | Positivity rate RSV (%) |                |
|------------------|----------------|---------------|-------------------------------|----------------|-------------------------|----------------|
|                  |                |               | Primary care                  | Secondary care | Primary care            | Secondary care |
| North Western    | Kaliningrad    | 2013/14       | -                             | -              | -                       | -              |
|                  |                | 2014/15       | -                             | -              | -                       | -              |
|                  |                | 2015/16       | -                             | -              | -                       | -              |
|                  |                | 2016/17       | 24.7%                         | 40.0%          | 7.7%                    | 15.0%          |
|                  |                | 2017/18       | -                             | -              | -                       | -              |
|                  |                | 2018/19       | 27.2%                         | 6.5%           | 14.2%                   | 22.9%          |
|                  | St. Petersburg | 2013/14       | 2.0%                          | 24.2%          | 3.0%                    | 10.7%          |
|                  |                | 2014/15       | 8.3%                          | 23.3%          | 2.0%                    | 4.1%           |
|                  |                | 2015/16       | 17.9%                         | 21.3%          | 2.2%                    | 7.7%           |
|                  |                | 2016/17       | 10.1%                         | 15.4%          | 0.0%                    | 5.2%           |
|                  |                | 2017/18       | 6.6%                          | 21.3%          | 2.3%                    | 4.7%           |
|                  |                | 2018/19       | 5.1%                          | 10.1%          | 3.9%                    | 6.5%           |
| Central          | Lipetsk        | 2013/14       | 26.1%                         | 14.9%          | 0.4%                    | 0.0%           |
|                  |                | 2014/15       | 17.1%                         | 21.4%          | 2.2%                    | 0.0%           |
|                  |                | 2015/16       | -                             | -              | -                       | -              |
|                  |                | 2016/17       | -                             | -              | -                       | -              |
|                  |                | 2017/18       | 6.2%                          | 3.1%           | 13.4%                   | 0.0%           |
|                  |                | 2018/19       | -                             | -              | -                       | -              |
| Far Eastern      | Chita          | 2013/14       | 15.5%                         | 19.5%          | 5.3%                    | 6.8%           |
|                  |                | 2014/15       | 9.1%                          | 11.7%          | 1.8%                    | 4.2%           |
|                  |                | 2015/16       | 5.9%                          | 8.5%           | 2.6%                    | 3.7%           |
|                  |                | 2016/17       | 9.0%                          | 12.4%          | 1.4%                    | 3.2%           |
|                  |                | 2017/18       | 6.2%                          | 6.4%           | 3.9%                    | 5.3%           |
|                  |                | 2018/19       | 8.7%                          | 7.8%           | 3.5%                    | 6.8%           |
|                  | Vladivostok    | 2013/14       | 17.8%                         | 50.0%          | 0.0%                    | 0.0%           |
|                  |                | 2014/15       | 7.3%                          | 15.0%          | 1.5%                    | 3.5%           |
|                  |                | 2015/16       | 12.8%                         | 19.2%          | 0.3%                    | 2.5%           |
|                  |                | 2016/17       | 15.8%                         | 32.0%          | 1.9%                    | 6.2%           |
|                  |                | 2017/18       | 15.2%                         | 21.6%          | 3.5%                    | 8.4%           |
|                  |                | 2018/19       | 9.6%                          | 15.4%          | 2.6%                    | 4.9%           |

8  
9 (a) In all sites, data was available from January 2014 to June 2014 for the season 2013/14, and from July to June next year  
10 for the remaining five seasons (from 2014/15 to 2018/19). Only seasons with at least 50 samples tested at both levels of  
11 care were included.

12 **Table S3.** Positivity rate for respiratory viruses other than influenza and respiratory syncytial virus by surveillance site and season. Samples from ILI  
 13 and SARI patients were merged before calculating virus-specific positivity rates.

14

| Surveillance site     | Season       | Parainfluenza viruses | Adenoviruses | Seasonal coronaviruses | Human metapneumovirus | Bocavirus   | Rhinoviruses |
|-----------------------|--------------|-----------------------|--------------|------------------------|-----------------------|-------------|--------------|
| <b>Kaliningrad</b>    | 2013/14      | 8.2%                  | 7.7%         | 0.0%                   | 0.0%                  | 0.5%        | 1.8%         |
|                       | 2014/15      | 12.3%                 | 12.3%        | 0.0%                   | 0.0%                  | 0.0%        | 4.5%         |
|                       | 2015/16      | 12.0%                 | 11.2%        | 0.4%                   | 1.2%                  | 0.4%        | 4.4%         |
|                       | 2016/17      | 5.4%                  | 5.4%         | 0.0%                   | 0.7%                  | 0.7%        | 1.8%         |
|                       | 2017/18      | 13.2%                 | 12.9%        | 0.0%                   | 0.0%                  | 0.0%        | 4.3%         |
|                       | 2018/19      | 8.2%                  | 12.8%        | 0.0%                   | 0.5%                  | 1.0%        | 3.6%         |
|                       | <b>Total</b> | <b>9.6%</b>           | <b>10.5%</b> | <b>0.1%</b>            | <b>0.4%</b>           | <b>0.5%</b> | <b>3.4%</b>  |
| <b>St. Petersburg</b> | 2013/14      | 6.8%                  | 0.8%         | 0.0%                   | 0.0%                  | 0.2%        | 4.2%         |
|                       | 2014/15      | 4.1%                  | 4.1%         | 0.0%                   | 0.0%                  | 0.1%        | 1.2%         |
|                       | 2015/16      | 4.5%                  | 2.4%         | 1.3%                   | 0.1%                  | 1.0%        | 5.7%         |
|                       | 2016/17      | 6.1%                  | 2.7%         | 2.0%                   | 2.4%                  | 1.2%        | 20.2%        |
|                       | 2017/18      | 5.9%                  | 2.8%         | 2.3%                   | 1.9%                  | 1.9%        | 14.9%        |
|                       | 2018/19      | 6.1%                  | 1.5%         | 3.9%                   | 4.4%                  | 2.5%        | 14.6%        |
|                       | <b>Total</b> | <b>5.5%</b>           | <b>2.5%</b>  | <b>1.6%</b>            | <b>1.4%</b>           | <b>1.1%</b> | <b>10.1%</b> |
| <b>Lipetsk</b>        | 2013/14      | 17.9%                 | 9.2%         | 0.0%                   | 0.0%                  | 0.2%        | 0.2%         |
|                       | 2014/15      | 12.3%                 | 7.2%         | 0.0%                   | 0.0%                  | 0.0%        | 0.0%         |
|                       | 2015/16      | 13.1%                 | 10.0%        | 0.0%                   | 0.0%                  | 0.0%        | 0.3%         |
|                       | 2016/17      | 26.8%                 | 14.8%        | 0.0%                   | 0.0%                  | 0.0%        | 0.0%         |
|                       | 2017/18      | 20.8%                 | 10.0%        | 0.0%                   | 0.0%                  | 0.0%        | 0.0%         |
|                       | 2018/19      | 24.5%                 | 19.7%        | 0.0%                   | 0.0%                  | 0.0%        | 0.5%         |

|                    |              |              |              |             |             |             |              |
|--------------------|--------------|--------------|--------------|-------------|-------------|-------------|--------------|
|                    | <b>Total</b> | <b>18.8%</b> | <b>11.3%</b> | <b>0.0%</b> | <b>0.0%</b> | <b>0.0%</b> | <b>0.1%</b>  |
| <b>Chita</b>       | 2013/14      | 5.3%         | 0.8%         | 1.0%        | 2.8%        | 0.5%        | 9.0%         |
|                    | 2014/15      | 2.3%         | 0.8%         | 0.0%        | 0.8%        | 0.8%        | 16.3%        |
|                    | 2015/16      | 4.4%         | 2.3%         | 0.7%        | 0.8%        | 0.4%        | 18.0%        |
|                    | 2016/17      | 3.1%         | 2.0%         | 1.8%        | 2.5%        | 0.4%        | 18.3%        |
|                    | 2017/18      | 2.3%         | 1.2%         | 0.8%        | 1.0%        | 0.5%        | 20.1%        |
|                    | 2018/19      | 2.7%         | 0.8%         | 2.6%        | 1.6%        | 0.5%        | 19.8%        |
|                    | <b>Total</b> | <b>3.4%</b>  | <b>1.3%</b>  | <b>1.2%</b> | <b>1.6%</b> | <b>0.5%</b> | <b>16.8%</b> |
| <b>Vladivostok</b> | 2013/14      | 5.2%         | 1.9%         | 0.5%        | 1.9%        | 2.4%        | 9.3%         |
|                    | 2014/15      | 4.5%         | 2.3%         | 0.1%        | 2.6%        | 0.8%        | 13.2%        |
|                    | 2015/16      | 2.9%         | 2.3%         | 0.0%        | 0.7%        | 1.2%        | 14.0%        |
|                    | 2016/17      | 2.1%         | 1.7%         | 0.1%        | 1.5%        | 0.5%        | 13.6%        |
|                    | 2017/18      | 4.4%         | 1.1%         | 0.7%        | 3.9%        | 0.7%        | 13.1%        |
|                    | 2018/19      | 2.3%         | 1.3%         | 0.8%        | 1.7%        | 1.2%        | 10.0%        |
|                    | <b>Total</b> | <b>3.4%</b>  | <b>1.7%</b>  | <b>0.4%</b> | <b>2.0%</b> | <b>1.1%</b> | <b>12.3%</b> |
| <b>Khabarovsk</b>  | 2013/14      | 0.0%         | 5.7%         | 0.0%        | 8.1%        | 0.8%        | 25.2%        |
|                    | 2014/15      | 4.3%         | 4.3%         | 0.0%        | 4.3%        | 2.2%        | 13.0%        |
|                    | 2015/16      | 8.3%         | 0.0%         | 1.7%        | 1.7%        | 1.7%        | 30.0%        |
|                    | 2016/17      | 3.8%         | 6.3%         | 0.0%        | 3.8%        | 0.0%        | 1.3%         |
|                    | 2017/18      | 3.1%         | 3.1%         | 0.0%        | 3.1%        | 1.0%        | 19.8%        |
|                    | 2018/19      | 1.5%         | 0.0%         | 1.5%        | 6.1%        | 0.0%        | 18.2%        |
|                    | <b>Total</b> | <b>3.0%</b>  | <b>3.6%</b>  | <b>0.4%</b> | <b>4.9%</b> | <b>0.8%</b> | <b>18.5%</b> |

16 **Table S4.** Proportion of influenza cases by virus (sub)type in each site and season.

| Federal District | Site           | Season *     | Influenza    |              |              |              |
|------------------|----------------|--------------|--------------|--------------|--------------|--------------|
|                  |                |              | No. cases †  | A(H1N1)      | A(H3N2)      | B            |
| North Western    | Kaliningrad    | 2013/14      | 22           | -            | -            | -            |
|                  |                | 2014/15      | 8            | -            | -            | -            |
|                  |                | 2015/16      | 26           | -            | -            | -            |
|                  |                | 2016/17      | 88           | 0.0%         | 58.0%        | 42.0%        |
|                  |                | 2017/18      | 23           | -            | -            | -            |
|                  |                | 2018/19      | 69           | 58.0%        | 36.2%        | 5.8%         |
|                  |                | <b>Total</b> | <b>236</b>   | <b>32.6%</b> | <b>44.9%</b> | <b>22.5%</b> |
|                  | St. Petersburg | 2013/14      | 53           | 11.3%        | 86.8%        | 1.9%         |
|                  |                | 2014/15      | 142          | 4.9%         | 59.9%        | 35.2%        |
|                  |                | 2015/16      | 123          | 88.6%        | 0.8%         | 10.6%        |
|                  |                | 2016/17      | 97           | 3.1%         | 71.1%        | 25.8%        |
|                  |                | 2017/18      | 134          | 6.0%         | 46.3%        | 47.8%        |
|                  |                | 2018/19      | 53           | 41.5%        | 56.6%        | 1.9%         |
| <b>Total</b>     |                | <b>602</b>   | <b>25.7%</b> | <b>48.7%</b> | <b>25.6%</b> |              |
| Central          | Lipetsk        | 2013/14      | 88           | 1.1%         | 89.8%        | 9.1%         |
|                  |                | 2014/15      | 88           | 3.4%         | 60.2%        | 36.4%        |
|                  |                | 2015/16      | 55           | 100.0%       | 0.0%         | 0.0%         |
|                  |                | 2016/17      | 78           | 0.0%         | 46.2%        | 53.8%        |
|                  |                | 2017/18      | 32           | -            | -            | -            |
|                  |                | 2018/19      | 36           | -            | -            | -            |
|                  |                | <b>Total</b> | <b>377</b>   | <b>24.4%</b> | <b>53.1%</b> | <b>22.5%</b> |
| Far Eastern      | Chita          | 2013/14      | 75           | 84.0%        | 1.3%         | 14.7%        |
|                  |                | 2014/15      | 72           | 0.0%         | 59.7%        | 40.3%        |
|                  |                | 2015/16      | 55           | 49.1%        | 40.0%        | 10.9%        |
|                  |                | 2016/17      | 86           | 0.0%         | 58.1%        | 41.9%        |
|                  |                | 2017/18      | 52           | 7.7%         | 67.3%        | 25.0%        |
|                  |                | 2018/19      | 60           | 81.7%        | 18.3%        | 0.0%         |
|                  |                | <b>Total</b> | <b>400</b>   | <b>35.8%</b> | <b>40.5%</b> | <b>23.8%</b> |
|                  | Vladivostok    | 2013/14      | 83           | 65.1%        | 2.4%         | 32.5%        |

|  |                   |              |            |              |              |              |
|--|-------------------|--------------|------------|--------------|--------------|--------------|
|  |                   | 2014/15      | 111        | 1.8%         | 35.1%        | 63.1%        |
|  |                   | 2015/16      | 107        | 65.4%        | 29.0%        | 5.6%         |
|  |                   | 2016/17      | 199        | 0.0%         | 63.3%        | 36.7%        |
|  |                   | 2017/18      | 164        | 32.9%        | 31.7%        | 35.4%        |
|  |                   | 2018/19      | 113        | 78.8%        | 19.5%        | 1.8%         |
|  |                   | <b>Total</b> | <b>727</b> | <b>37.0%</b> | <b>37.4%</b> | <b>25.6%</b> |
|  | <b>Khabarovsk</b> | 2013/14      | 5          | -            | -            | -            |
|  |                   | 2014/15      | 8          | -            | -            | -            |
|  |                   | 2015/16      | 2          | -            | -            | -            |
|  |                   | 2016/17      | 7          | -            | -            | -            |
|  |                   | 2017/18      | 6          | -            | -            | -            |
|  |                   | 2018/19      | 3          | -            | -            | -            |
|  |                   | <b>Total</b> | <b>31</b>  | <b>-</b>     | <b>-</b>     | <b>-</b>     |

17

18 \* For all sites, data was available from January 2014 to April 2019.

19 † The proportion of influenza cases caused by each influenza virus (sub)type was calculated only in seasons with at least 50 reported influenza cases.

20 **Table S5.** Monthly average positivity rate for influenza and respiratory syncytial virus (RSV) in each surveillance site in Russia (from January 2014 to  
 21 April 2019).

| District | North Western                       |              |                |              | Central      |             | Far Eastern  |             |              |             |
|----------|-------------------------------------|--------------|----------------|--------------|--------------|-------------|--------------|-------------|--------------|-------------|
| Site     | Kaliningrad                         |              | St. Petersburg |              | Lipetsk      |             | Chita        |             | Vladivostok  |             |
| Virus    | Influenza                           | RSV          | Influenza      | RSV          | Influenza    | RSV         | Influenza    | RSV         | Influenza    | RSV         |
| Month    | Monthly average positivity rate (%) |              |                |              |              |             |              |             |              |             |
| Jan      | 21.0%                               | <b>20.2%</b> | 23.0%          | 5.2%         | 15.5%        | <b>8.6%</b> | 14.2%        | <b>7.5%</b> | 27.9%        | 2.7%        |
| Feb      | <b>33.3%</b>                        | 7.6%         | <b>31.9%</b>   | 5.5%         | 25.1%        | 2.9%        | <b>23.2%</b> | 5.1%        | <b>41.2%</b> | 0.5%        |
| Mar      | 33.1%                               | 6.8%         | 28.1%          | 12.6%        | <b>34.3%</b> | 6.5%        | 17.9%        | 6.0%        | 34.9%        | 0.6%        |
| Apr      | 18.1%                               | 13.2%        | 23.8%          | <b>13.9%</b> | 15.7%        | 2.9%        | 10.5%        | 5.4%        | 17.2%        | 1.2%        |
| May      | 0.0%                                | 12.2%        | 12.8%          | 4.1%         | 3.9%         | 3.2%        | 7.2%         | 1.3%        | 5.7%         | 1.1%        |
| Jun      | 0.0%                                | 8.4%         | 2.0%           | 4.9%         | 0.0%         | 3.5%        | 0.8%         | 1.6%        | 0.3%         | 0.6%        |
| Jul      | 0.0%                                | 5.1%         | 0.0%           | 1.7%         | 0.0%         | 3.1%        | 0.0%         | 0.0%        | 0.0%         | 0.3%        |
| Aug      | 0.0%                                | 0.0%         | 0.0%           | 0.0%         | 0.0%         | 8.2%        | 0.0%         | 0.8%        | 0.0%         | 0.3%        |
| Sep      | 0.0%                                | 3.8%         | 0.0%           | 0.7%         | 0.0%         | 7.5%        | 0.0%         | 1.3%        | 0.0%         | 1.7%        |
| Oct      | 0.0%                                | 6.5%         | 0.3%           | 0.7%         | 0.0%         | 3.4%        | 0.0%         | 0.3%        | 0.0%         | 3.8%        |
| Nov      | 0.0%                                | 6.2%         | 0.8%           | 0.4%         | 1.3%         | 1.3%        | 0.2%         | 0.8%        | 0.2%         | 4.0%        |
| Dec      | 4.6%                                | 10.4%        | 7.5%           | 2.4%         | 6.7%         | 2.4%        | 7.5%         | 5.4%        | 7.0%         | <b>8.5%</b> |

22

23

24 **Table S6.** Seasonality of influenza epidemics in each surveillance site in Russia (January 2014 to April 2019). Odds ratio (OR) with corresponding  
 25 95% confidence intervals for testing positive for influenza or respiratory syncytial virus (RSV) in each month compared to the month with the highest  
 26 OR for a positive test in each surveillance site (reference, in bold).

| District         | North Western |           |         |                |            |         | Central     |            |         | Far Eastern |            |         |             |            |         |
|------------------|---------------|-----------|---------|----------------|------------|---------|-------------|------------|---------|-------------|------------|---------|-------------|------------|---------|
| Site             | Kaliningrad   |           |         | St. Petersburg |            |         | Lipetsk     |            |         | Chita       |            |         | Vladivostok |            |         |
| Month            | OR            | 95% CI    | p-value | OR             | 95% CI     | p-value | OR          | 95% CI     | p-value | OR          | 95% CI     | p-value | OR          | 95% CI     | p-value |
| <b>Influenza</b> |               |           |         |                |            |         |             |            |         |             |            |         |             |            |         |
| Jan              | 0.69          | 0.44-1.06 | 0.093   | 0.62           | 0.46-0.83  | 0.001   | 0.43        | 0.29-0.63  | <0.001  | 0.55        | 0.40-0.77  | <0.001  | 0.58        | 0.45-0.75  | <0.001  |
| Feb              | <b>1.00</b>   |           |         | <b>1.00</b>    |            |         | 0.59        | 0.44-0.80  | <0.001  | <b>1.00</b> |            |         | <b>1.00</b> |            |         |
| Mar              | 0.82          | 0.54-1.23 | 0.327   | 0.82           | 0.63-1.07  | 0.141   | <b>1.00</b> |            |         | 0.74        | 0.55-0.99  | 0.040   | 0.74        | 0.58-0.94  | 0.014   |
| Apr              | 0.35          | 0.21-0.60 | <0.001  | 0.79           | 0.59-1.04  | 0.098   | 0.31        | 0.22-0.45  | <0.001  | 0.40        | 0.28-0.56  | <0.001  | 0.30        | 0.22-0.39  | <0.001  |
| May              | -             | -         | -       | 0.25           | 0.16-0.40  | <0.001  | 0.06        | 0.02-0.13  | <0.001  | 0.26        | 0.15-0.44  | <0.001  | 0.07        | 0.04-0.13  | <0.001  |
| Jun              | -             | -         | -       | 0.04           | 0.01-0.10  | <0.001  | -           | -          | -       | 0.02        | 0.003-0.15 | <0.001  | 0.01        | 0.001-0.04 | <0.001  |
| Jul              | -             | -         | -       | -              | -          | -       | -           | -          | -       | -           | -          | -       | -           | -          | -       |
| Aug              | -             | -         | -       | -              | -          | -       | -           | -          | -       | -           | -          | -       | -           | -          | -       |
| Sep              | -             | -         | -       | -              | -          | -       | -           | -          | -       | -           | -          | -       | -           | -          | -       |
| Oct              | -             | -         | -       | 0.01           | 0.001-0.04 | <0.001  | -           | -          | -       | -           | -          | -       | -           | -          | -       |
| Nov              | -             | -         | -       | 0.01           | 0.003-0.05 | <0.001  | 0.02        | 0.006-0.06 | <0.001  | 0.01        | 0.001-0.06 | <0.001  | 0.01        | 0.001-0.02 | <0.001  |
| Dec              | 0.12          | 0.06-0.22 | <0.001  | 0.15           | 0.10-0.25  | <0.001  | 0.12        | 0.08-0.20  | <0.001  | 0.25        | 0.17-0.38  | <0.001  | 0.14        | 0.09-0.19  | <0.001  |
| <b>RSV</b>       |               |           |         |                |            |         |             |            |         |             |            |         |             |            |         |
| Jan              | <b>1.00</b>   |           |         | 0.43           | 0.24-0.75  | 0.003   | 0.60        | 0.29-1.25  | 0.174   | <b>1.00</b> |            |         | 0.33        | 0.19-0.59  | <0.001  |
| Feb              | 0.30          | 0.16-0.57 | <0.001  | 0.45           | 0.28-0.74  | 0.002   | 0.30        | 0.14-0.63  | 0.002   | 0.72        | 0.42-1.21  | 0.214   | 0.07        | 0.03-0.20  | <0.001  |
| Mar              | 0.23          | 0.11-0.46 | <0.001  | 0.97           | 0.63-1.50  | 0.898   | 0.41        | 0.20-0.82  | 0.012   | 0.79        | 0.48-1.31  | 0.367   | 0.07        | 0.03-0.20  | <0.001  |
| Apr              | 0.54          | 0.28-1.03 | 0.063   | <b>1.00</b>    |            |         | 0.34        | 0.16-0.74  | 0.006   | 0.71        | 0.41-1.20  | 0.201   | 0.14        | 0.06-0.31  | <0.001  |
| May              | 0.46          | 0.18-1.18 | 0.107   | 0.32           | 0.15-0.70  | 0.004   | 0.45        | 0.19-1.05  | 0.066   | 0.18        | 0.05-0.59  | 0.005   | 0.13        | 0.05-0.37  | <0.001  |
| Jun              | 0.39          | 0.16-0.92 | 0.032   | 0.36           | 0.17-0.76  | 0.007   | 0.36        | 0.14-0.96  | 0.041   | 0.26        | 0.08-0.86  | 0.027   | 0.04        | 0.01-0.26  | 0.001   |
| Jul              | 0.17          | 0.05-0.56 | 0.004   | 0.10           | 0.03-0.34  | <0.001  | 0.34        | 0.13-0.90  | 0.030   | -           | -          | -       | 0.04        | 0.01-0.26  | 0.001   |
| Aug              | -             | -         | -       | -              | -          | -       | <b>1.00</b> |            |         | 0.08        | 0.01-0.60  | 0.014   | 0.04        | 0.01-0.28  | 0.001   |



|     |      |           |        |      |            |        |      |           |        |      |            |        |             |           |        |
|-----|------|-----------|--------|------|------------|--------|------|-----------|--------|------|------------|--------|-------------|-----------|--------|
| Sep | 0.14 | 0.04-0.48 | 0.002  | 0.06 | 0.01-0.24  | <0.001 | 0.71 | 0.34-1.47 | 0.354  | 0.16 | 0.04-0.67  | 0.012  | 0.22        | 0.09-0.53 | <0.001 |
| Oct | 0.26 | 0.13-0.56 | <0.001 | 0.05 | 0.01-0.22  | <0.001 | 0.30 | 0.13-0.69 | 0.005  | 0.04 | 0.005-0.26 | 0.001  | 0.41        | 0.22-0.77 | 0.005  |
| Nov | 0.39 | 0.20-0.77 | 0.007  | 0.03 | 0.004-0.21 | <0.001 | 0.10 | 0.03-0.35 | <0.001 | 0.10 | 0.03-0.34  | <0.001 | 0.38        | 0.21-0.69 | 0.001  |
| Dec | 0.54 | 0.30-0.97 | 0.039  | 0.23 | 0.11-0.51  | <0.001 | 0.28 | 0.12-0.64 | 0.003  | 0.71 | 0.41-1.23  | 0.222  | <b>1.00</b> |           |        |

**Figure S1.** Map of the Russian Federation showing the geographical distribution of the cities included in the Sentinel Surveillance System. Data from cities in dark blue areas were included in the present analysis, while those in light blue area were not included (see text for details).

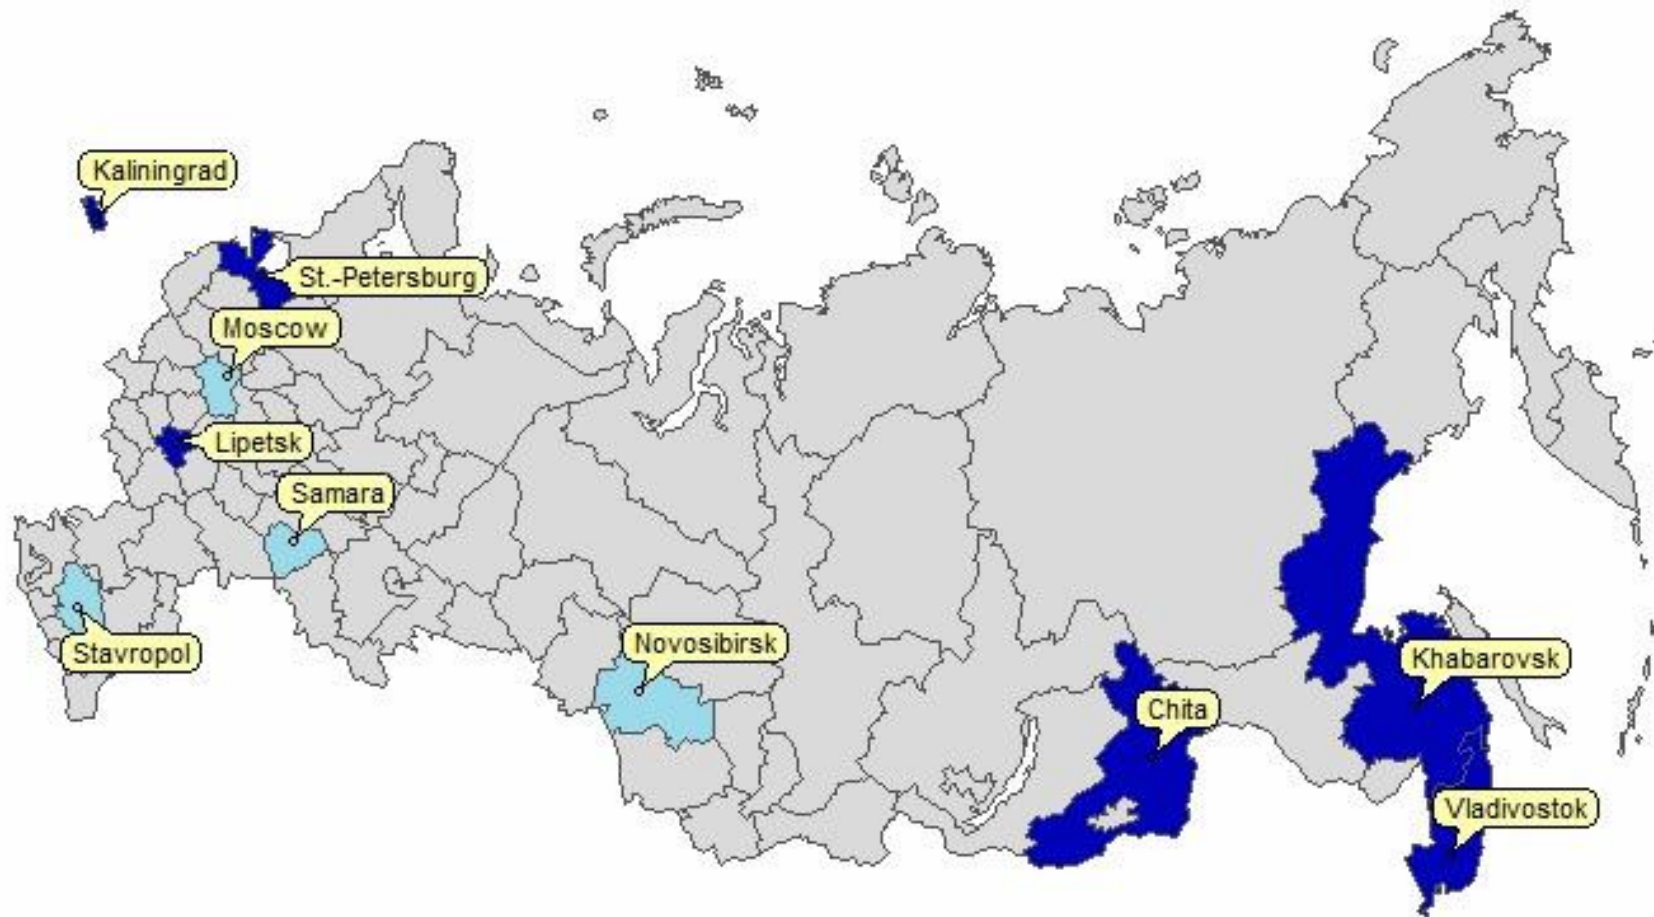

**Figure S2.** Monthly number of respiratory specimens (grey) and of those testing positive for influenza virus (red) or respiratory syncytial virus (blue) by surveillance site: Kaliningrad (panel a), St. Petersburg (panel b), Lipetsk (panel c), Chita (panel d), Vladivostok (panel e), and Khabarovsk (panel f). Russia, January 2014 to April 2019. Samples from ILI and SARI patients were merged before calculating virus-specific positivity rates.

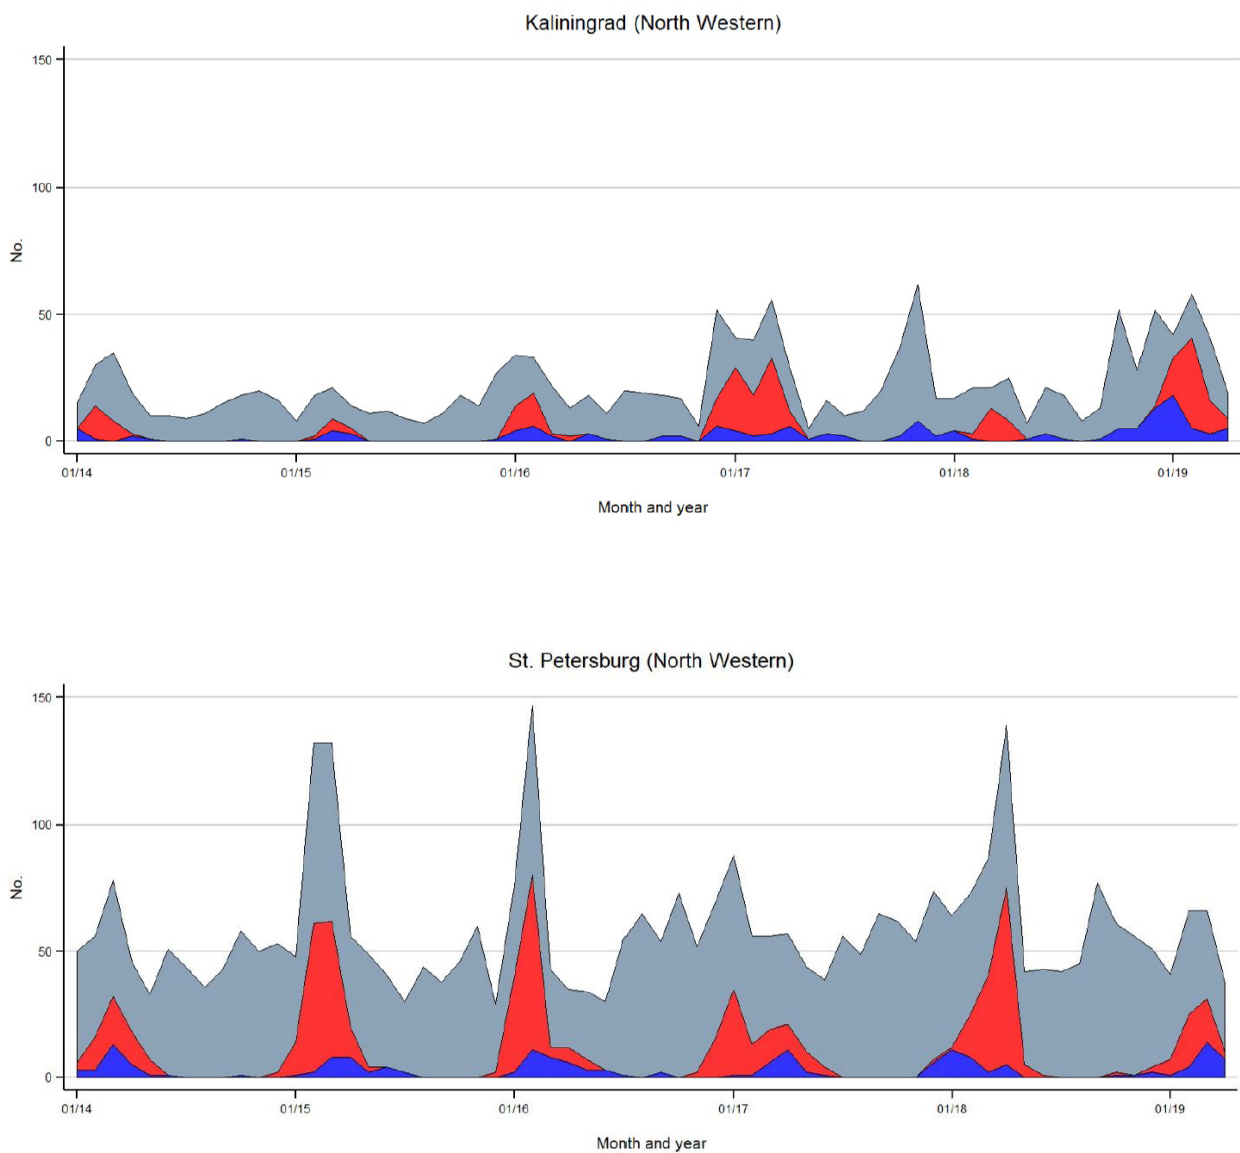

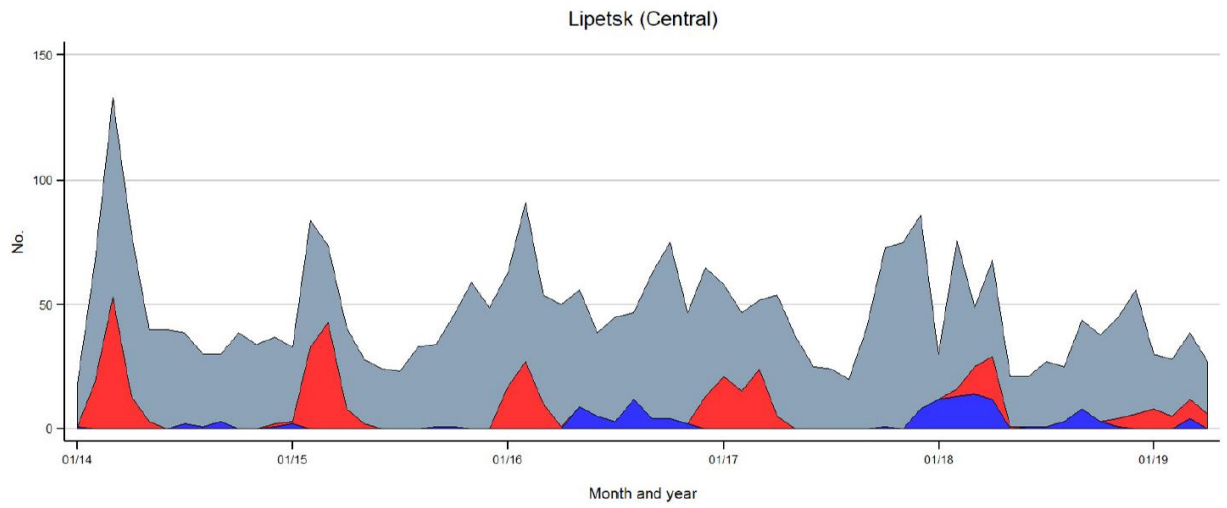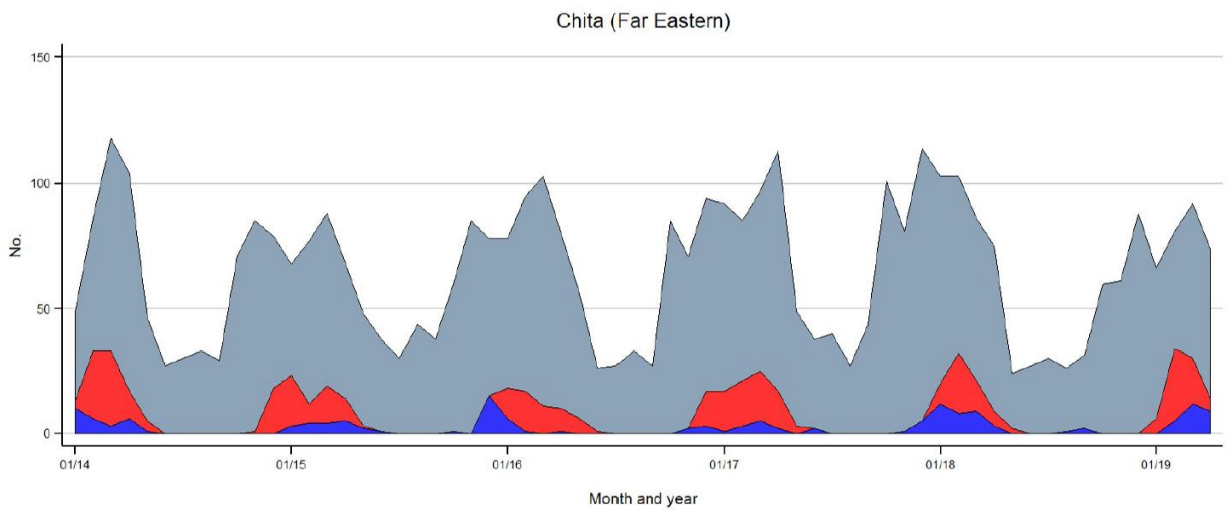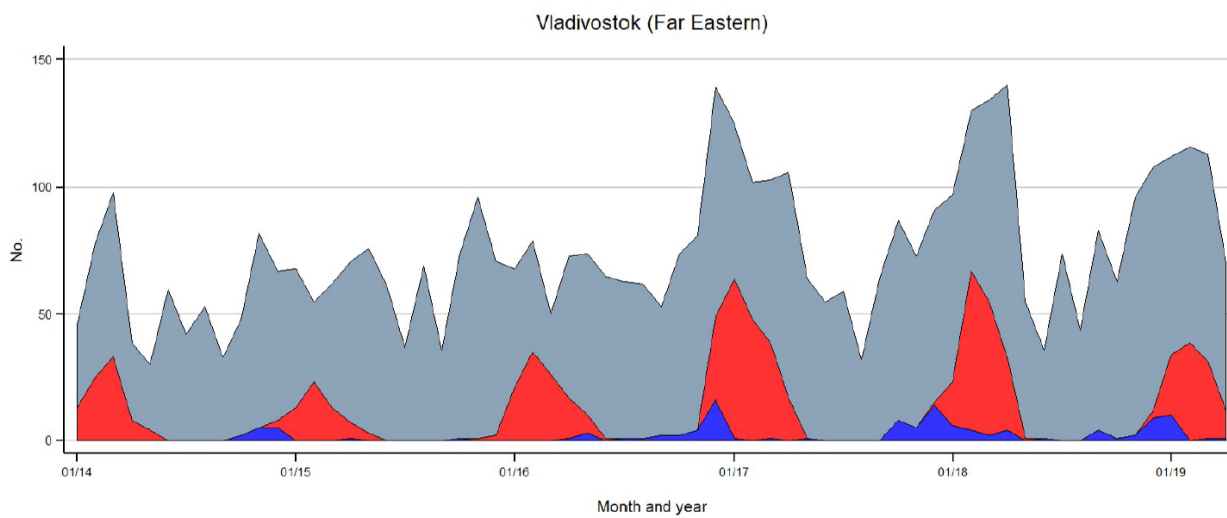

### Khabarovsk (Far Eastern)

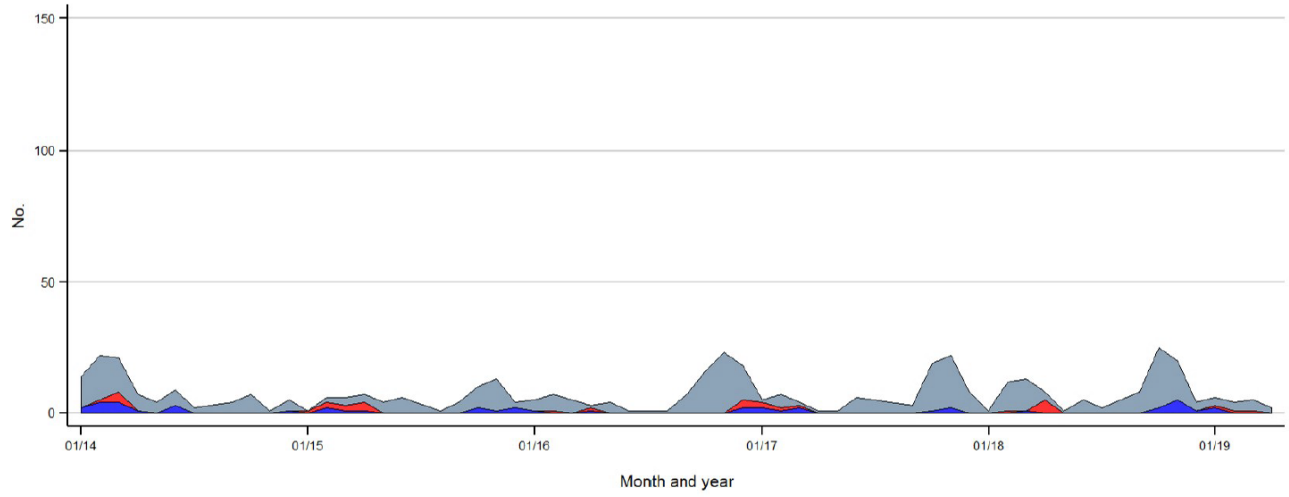

**Figure S3.** Age distribution of patients infected with influenza A(H1N1)pdm09 virus in primary and secondary level of care. Russia, January 2014 to April 2019.

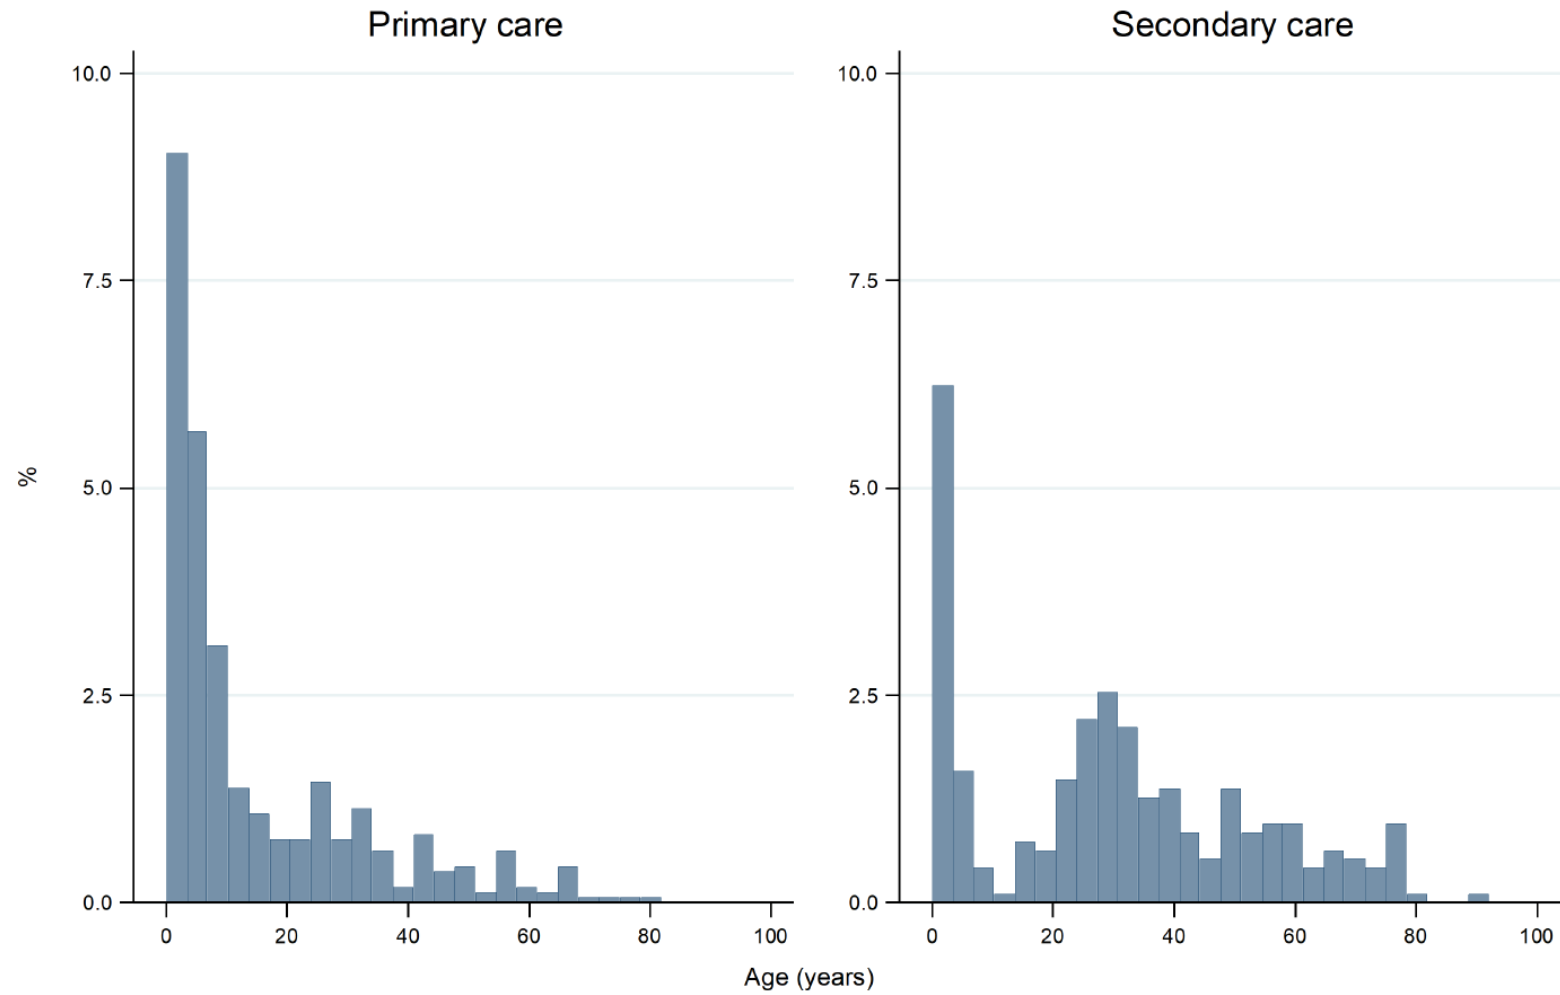

**Figure S4.** Age distribution of patients infected with influenza A(H3N2) virus in primary and secondary level of care. Russia, January 2014 to April 2019.

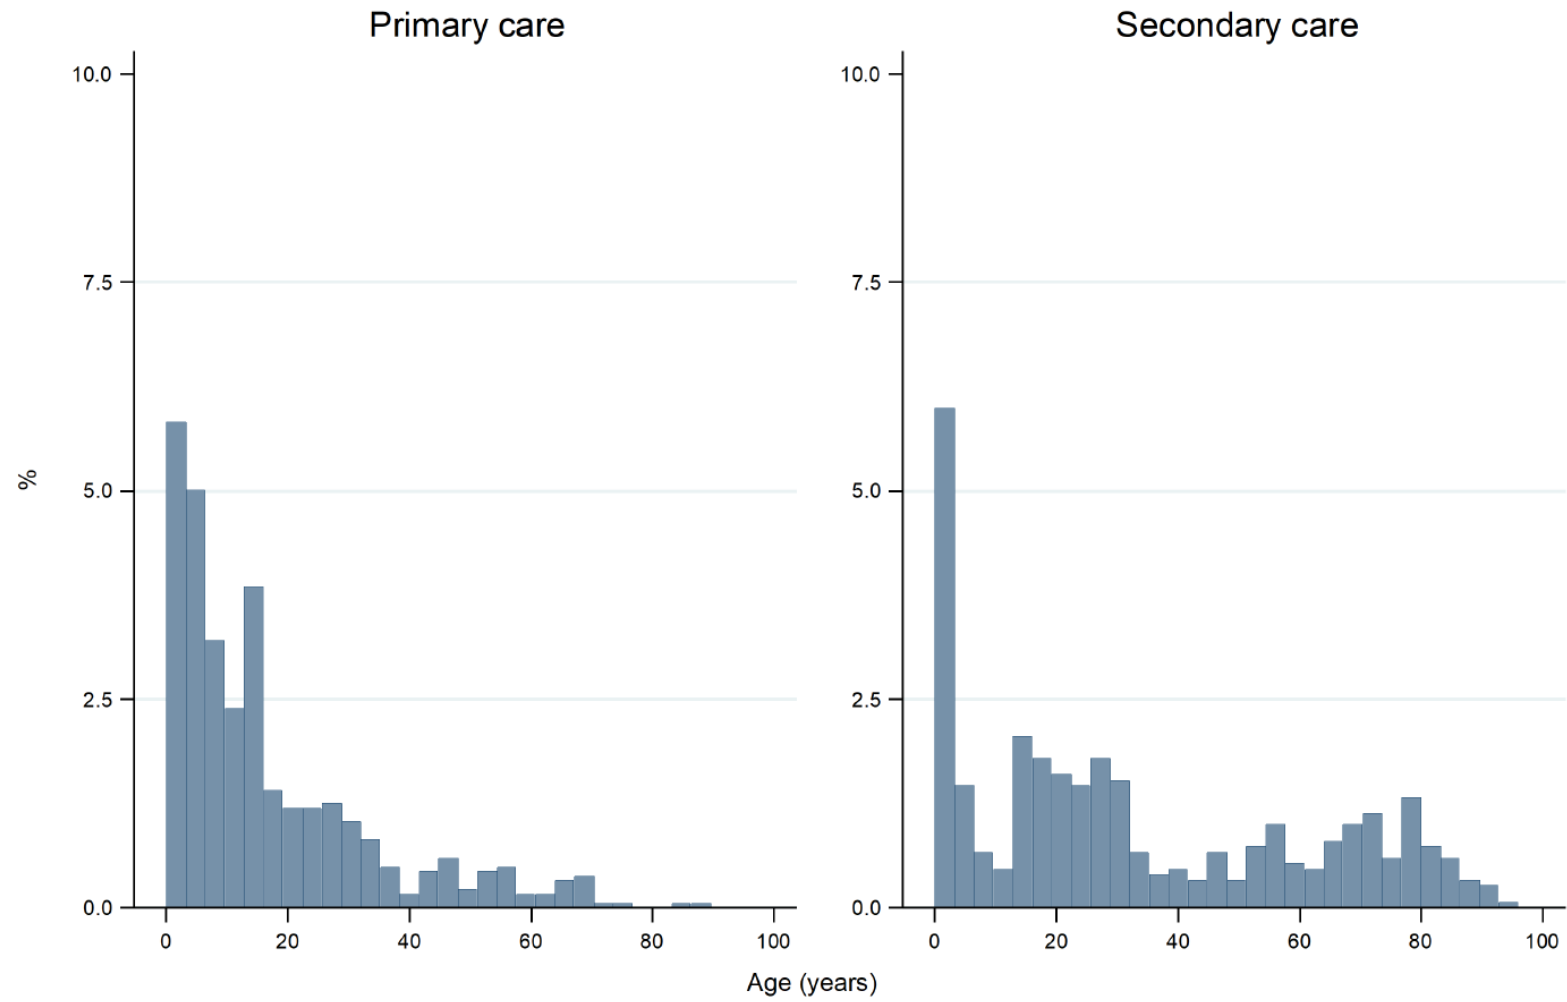

**Figure S5.** Age distribution of patients infected with influenza B virus in primary and secondary level of care. Russia, January 2014 to April 2019.

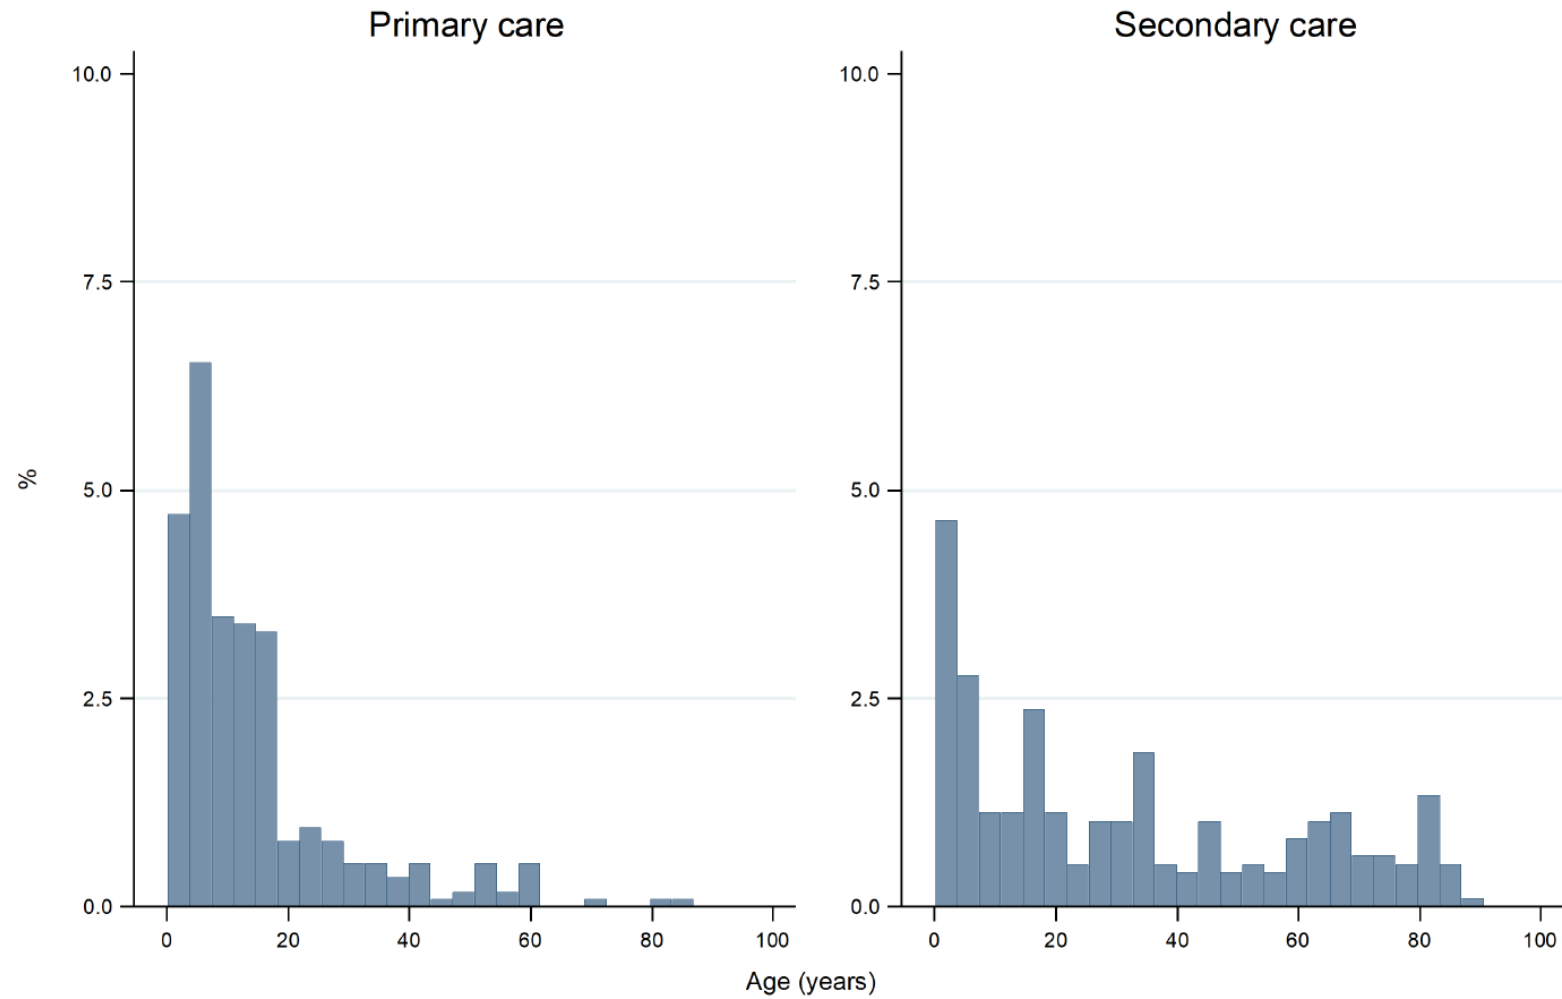



**Figure S6.** Age distribution of patients infected with respiratory syncytial virus in primary and secondary level of care. Russia, January 2014 to April 2019.

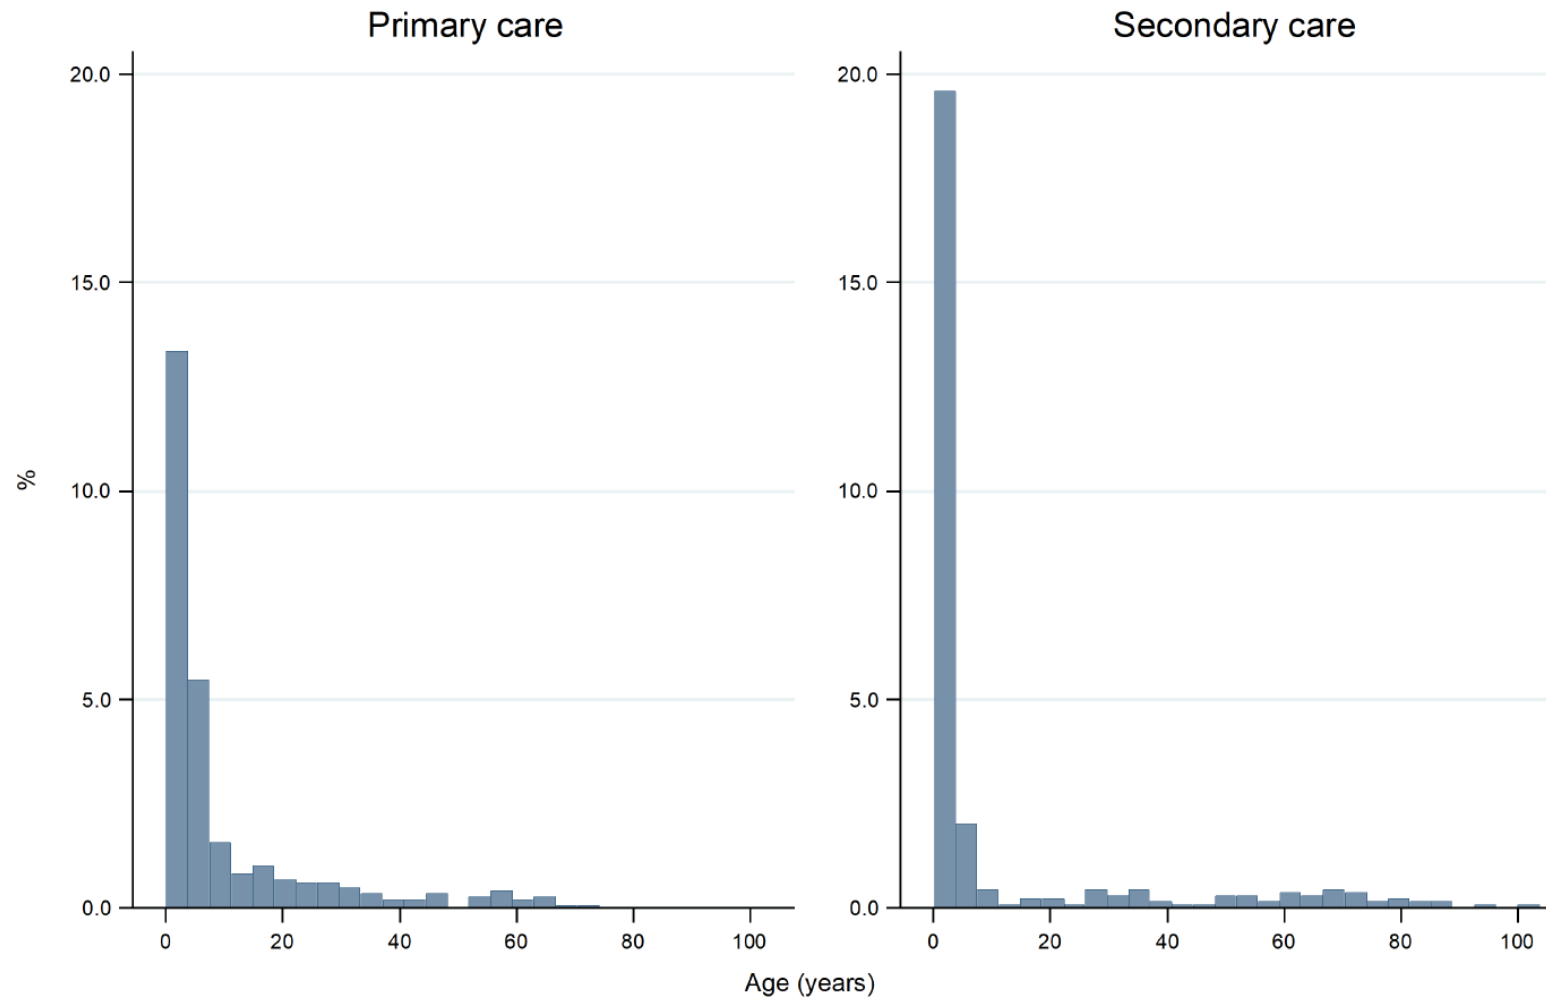

**Figure S7.** Seasonality of influenza epidemics in each surveillance site in Russia (January 2014 to April 2019): Kaliningrad (panel a), St. Petersburg (panel b), Lipetsk (panel c), Chita (panel d), and Vladivostok (panel e). Odds ratio (OR) with corresponding 95% confidence intervals for having an influenza-positive test in each month compared to the peak month (reference).

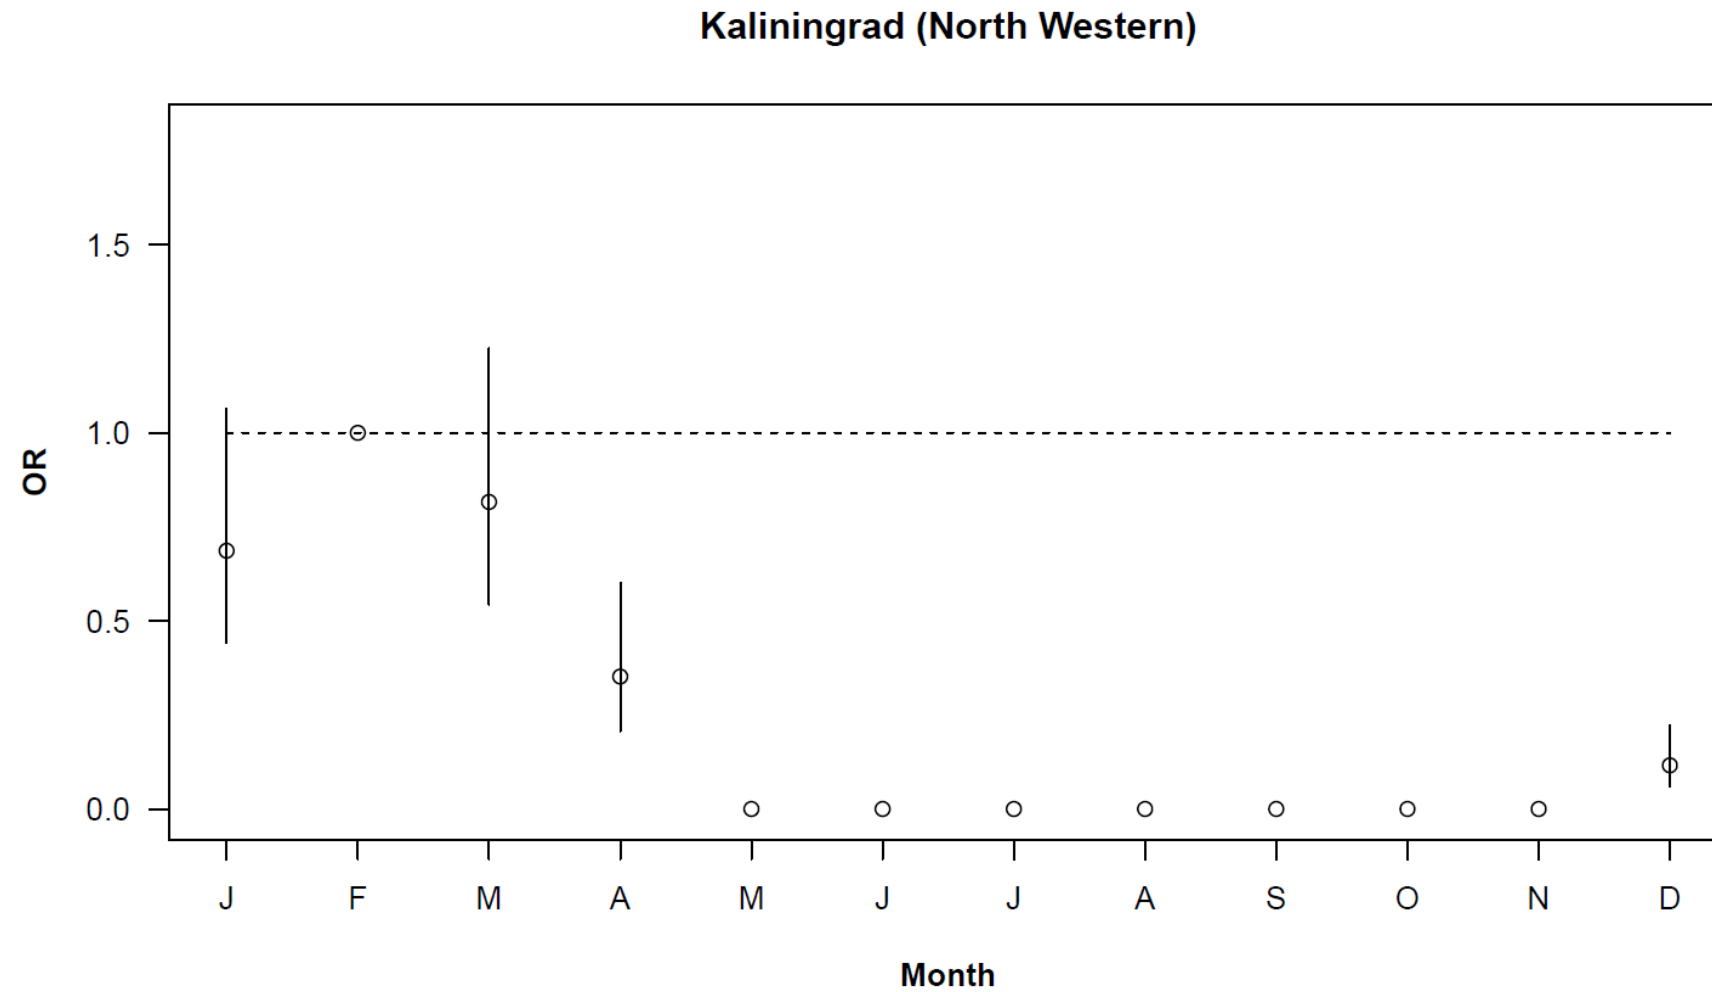

### St. Petersburg (North Western)

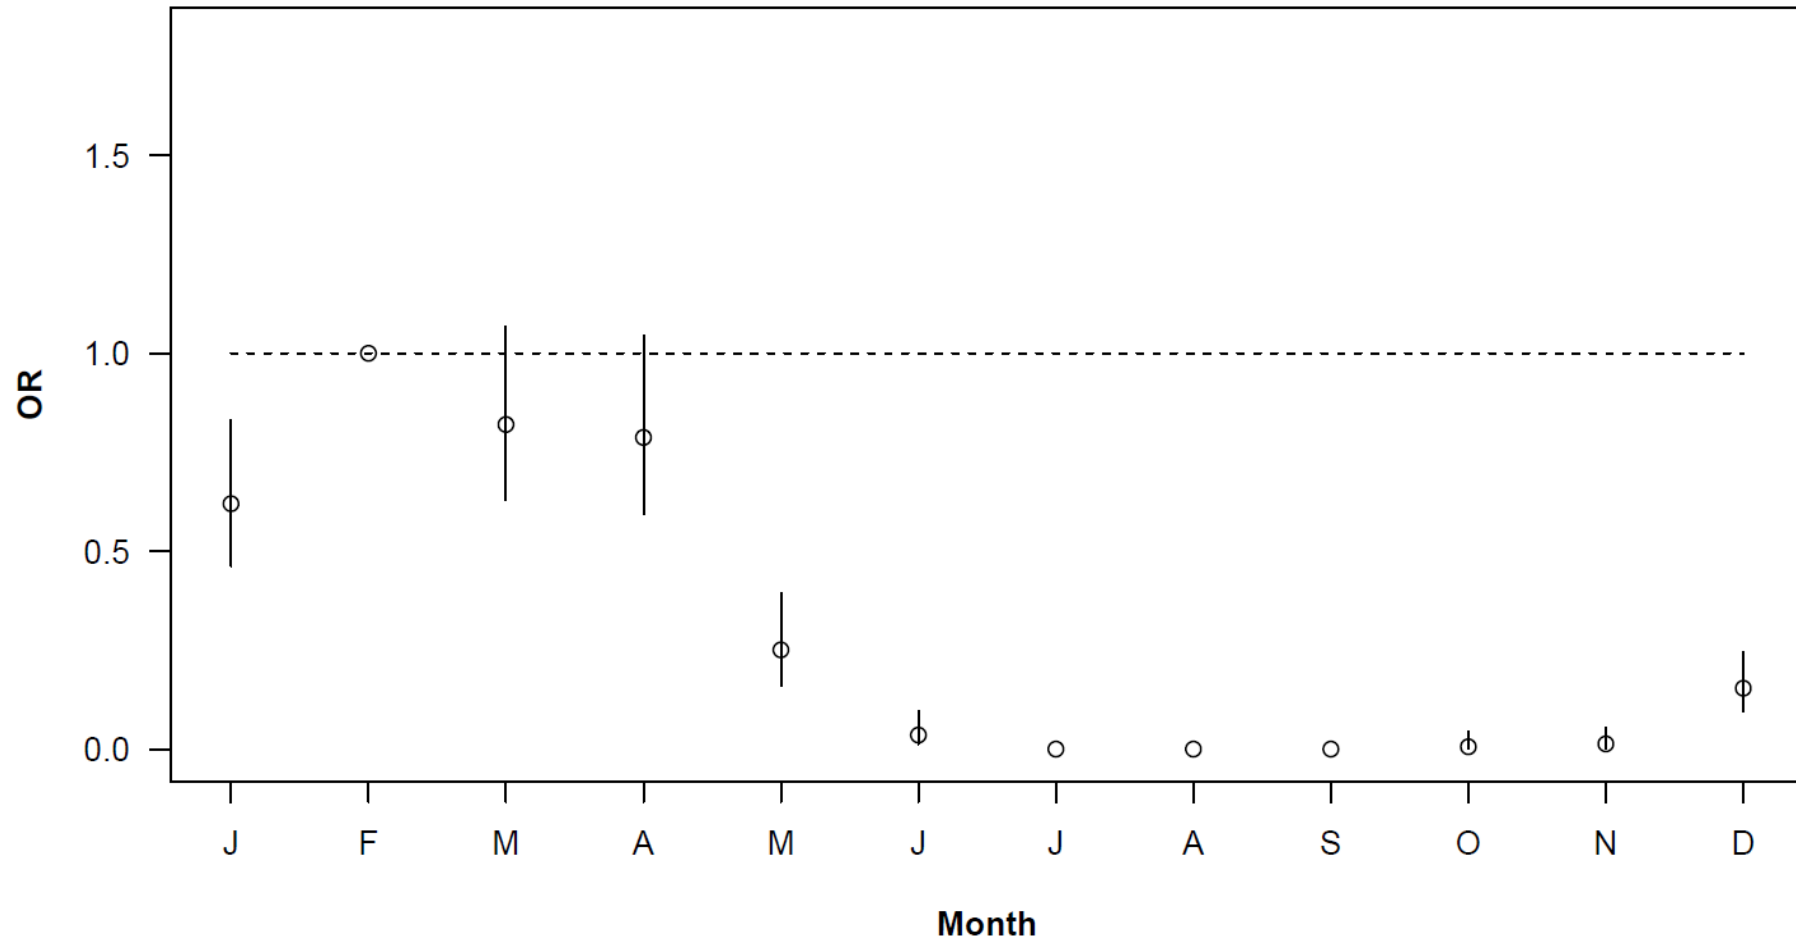

### Lipetsk (Central)

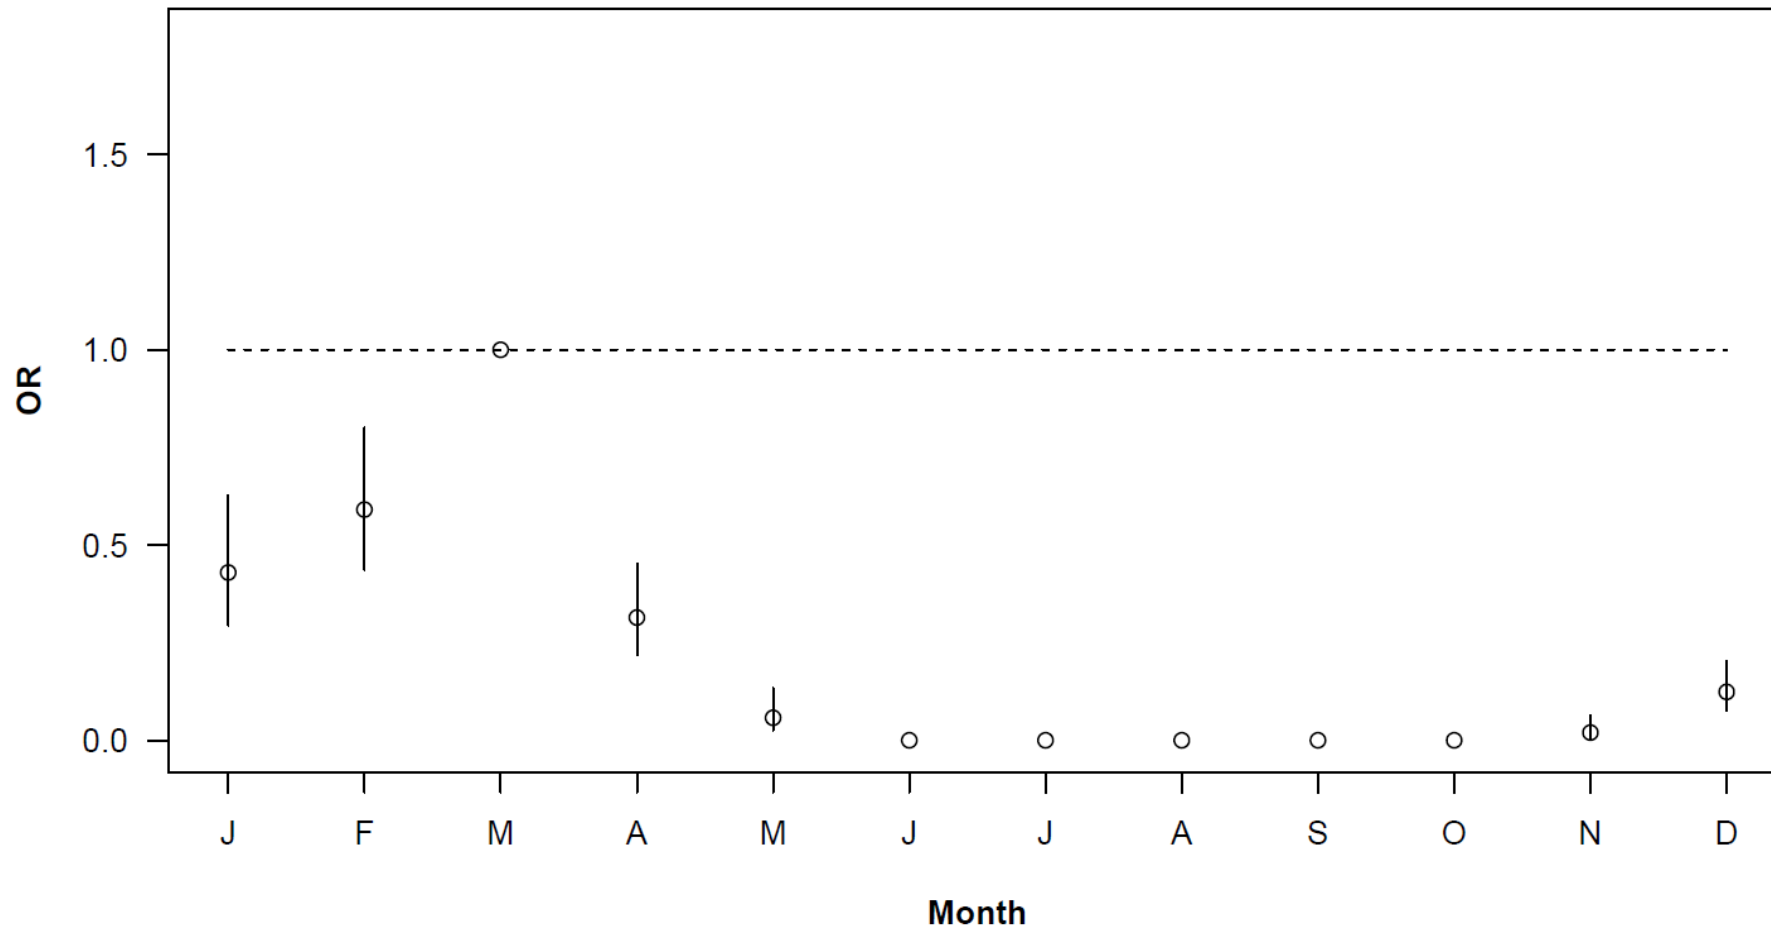

### Chita (Far Eastern)

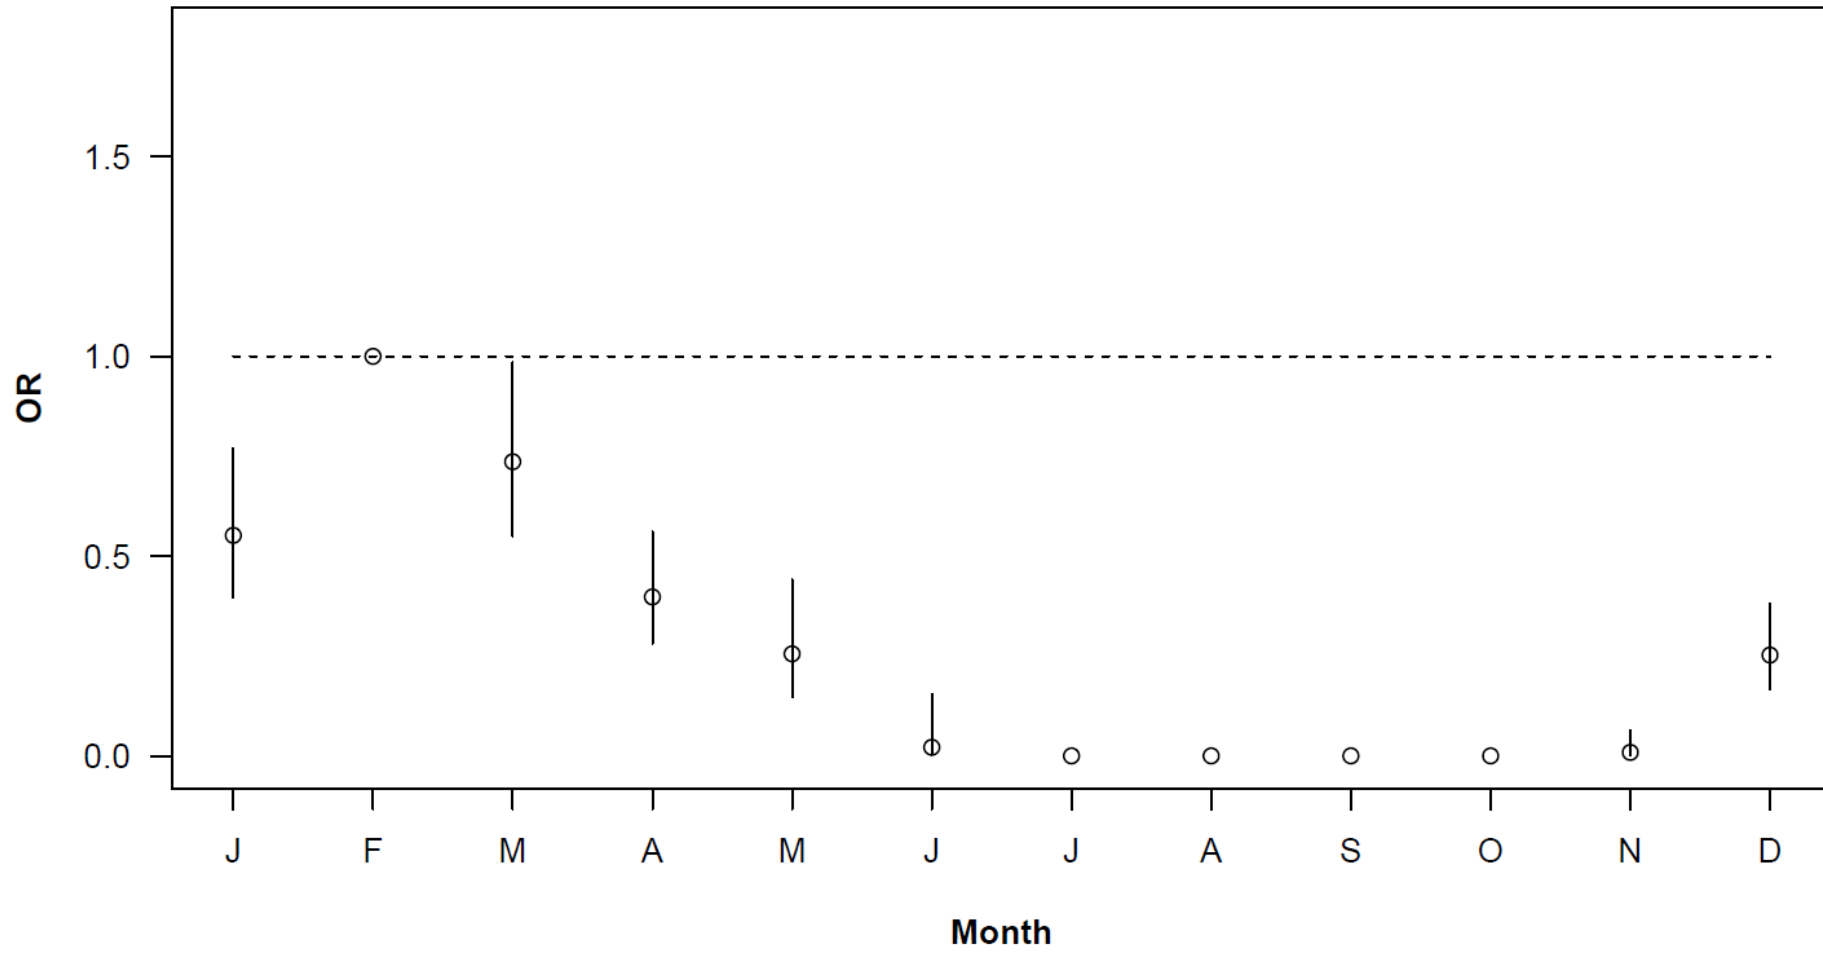

### Vladivostok (Far Eastern)

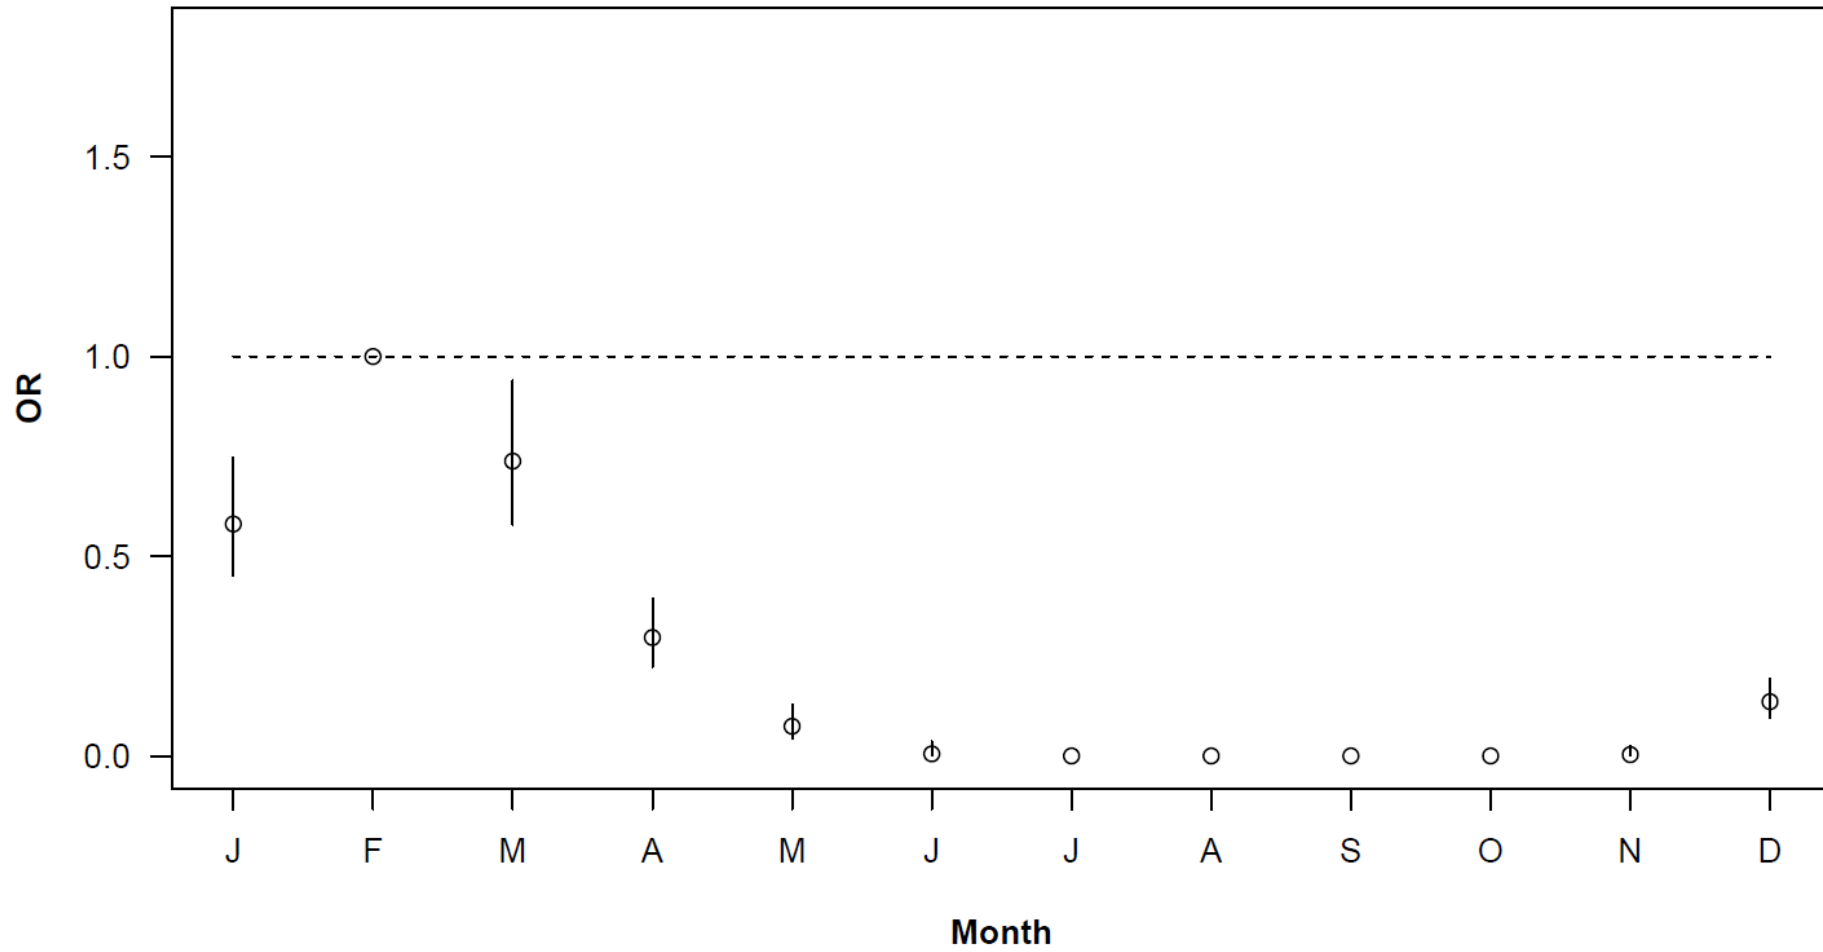

**Figure S8.** Seasonality of respiratory syncytial virus (RSV) epidemics in each surveillance site in Russia (January 2014 to April 2019): Kaliningrad (panel a), St. Petersburg (panel b), Lipetsk (panel c), Chita (panel d), and Vladivostok (panel e). Odds ratio (OR) with corresponding 95% confidence intervals for having an RSV-positive test in each month compared to the peak month (reference).

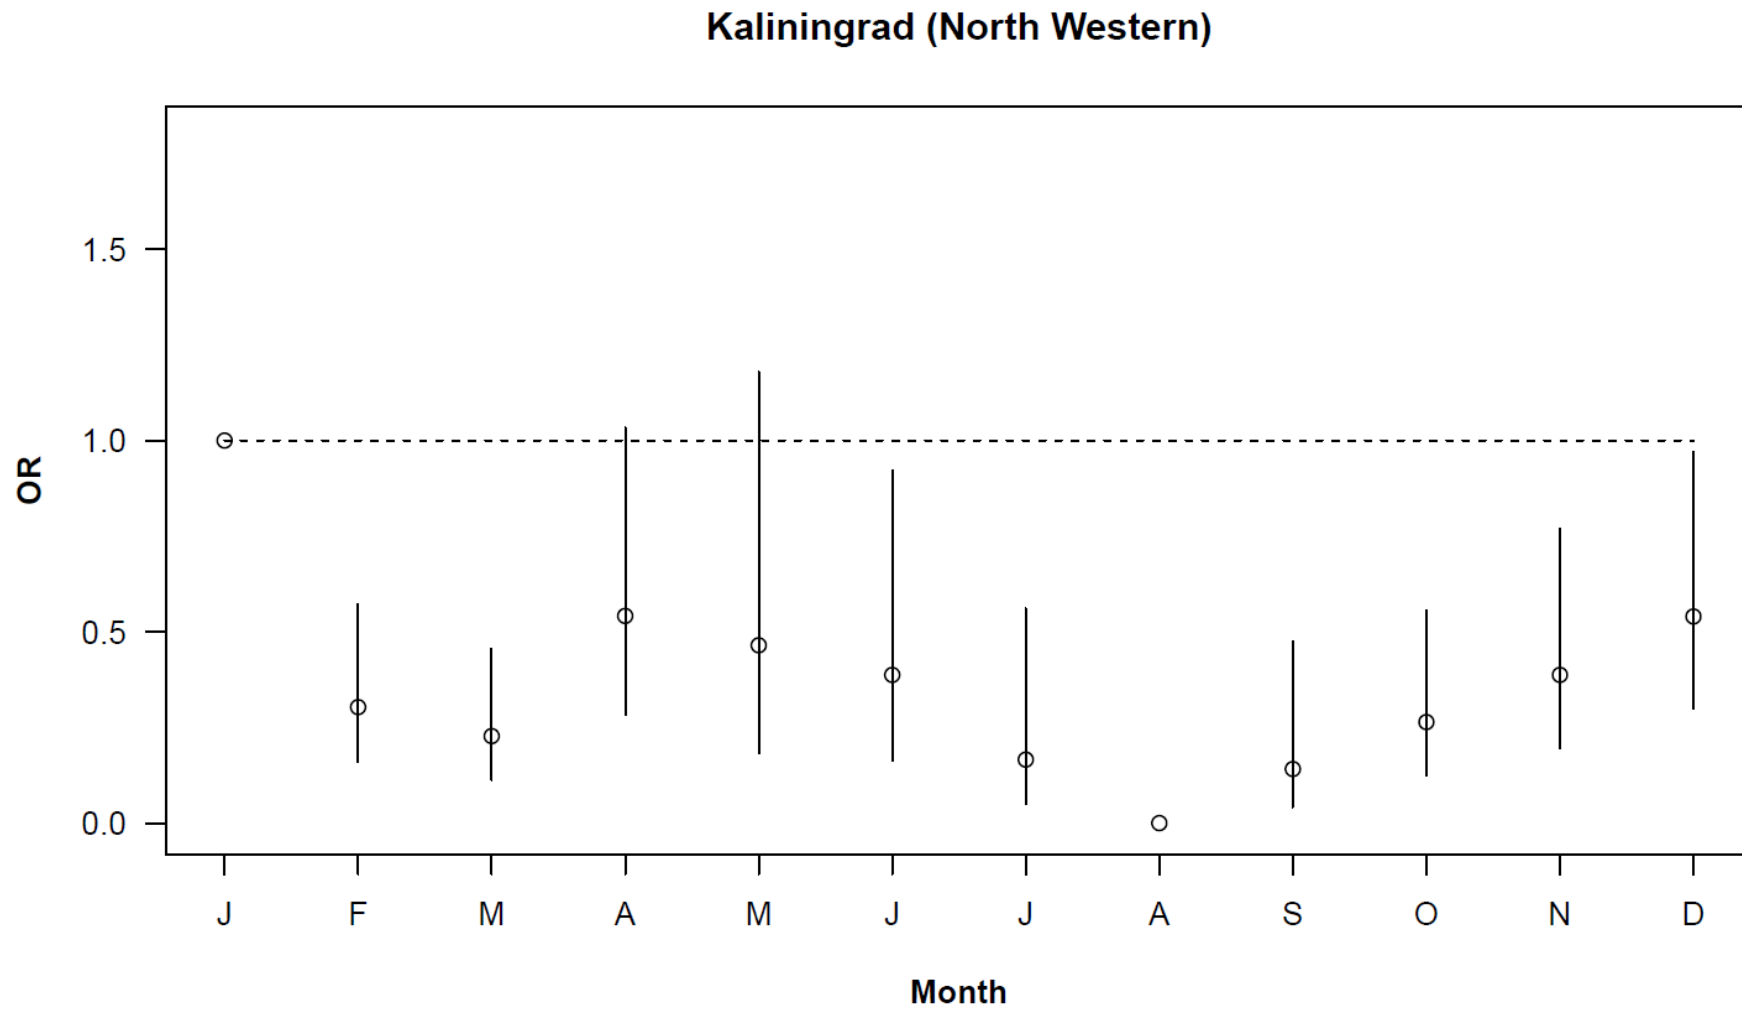

### St. Petersburg (North Western)

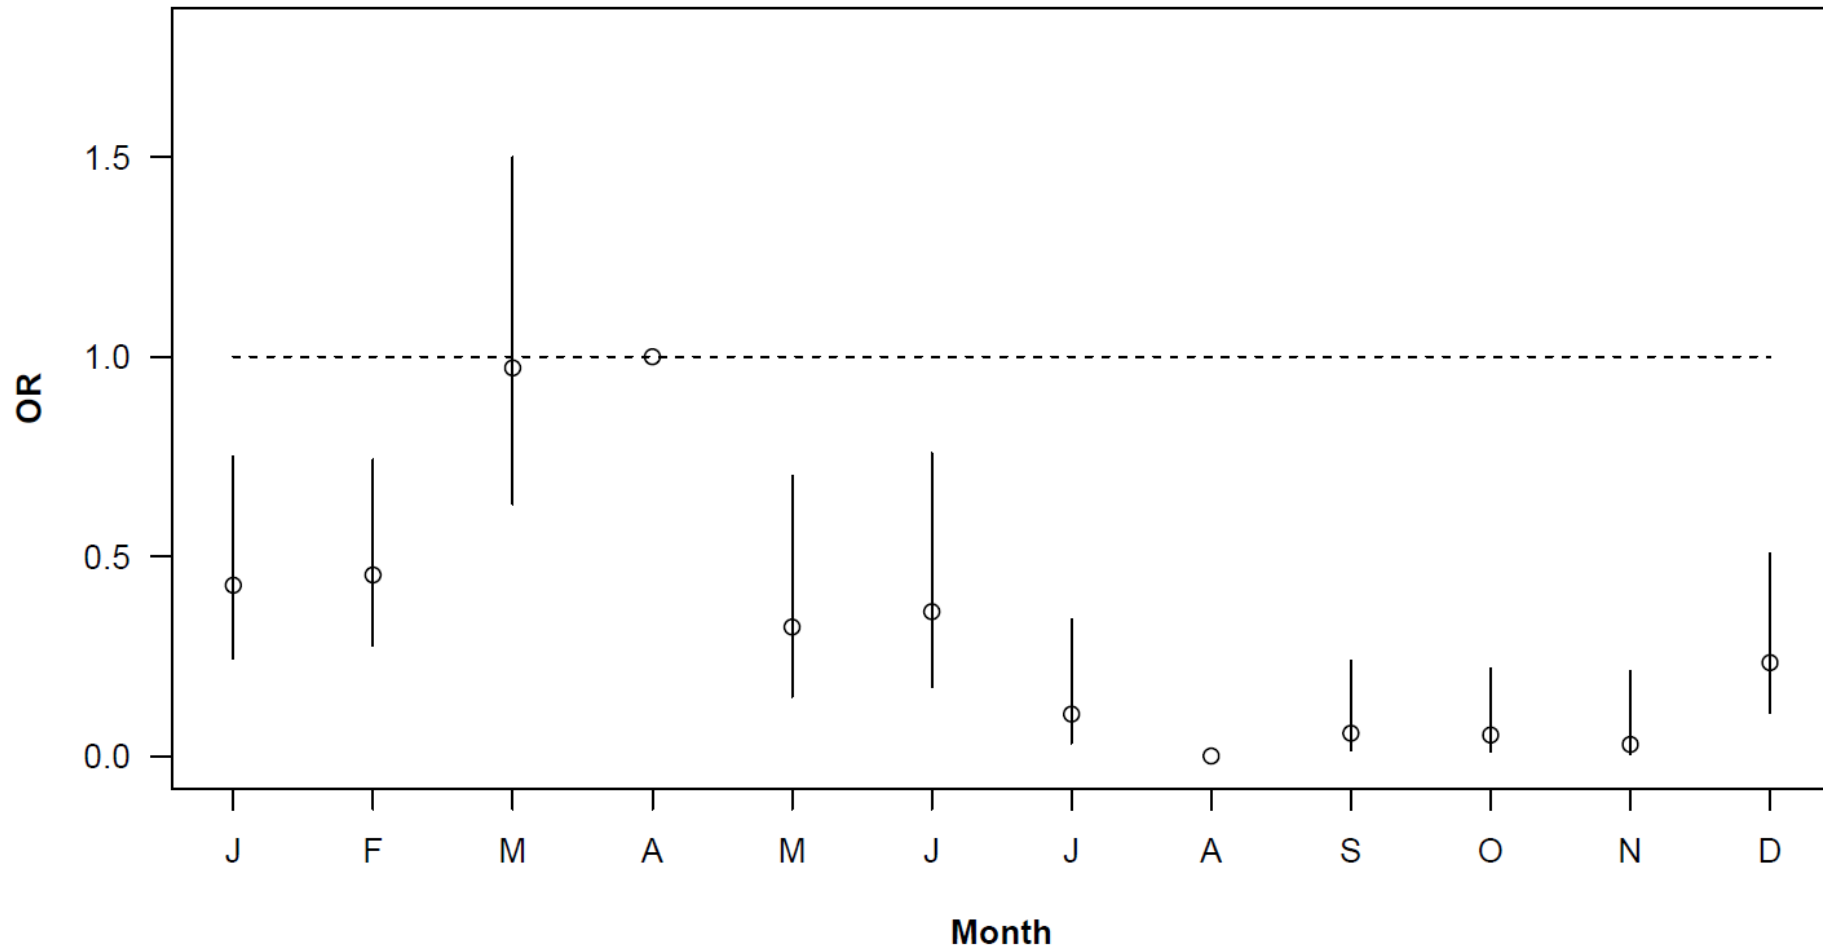



### Lipetsk (Central)

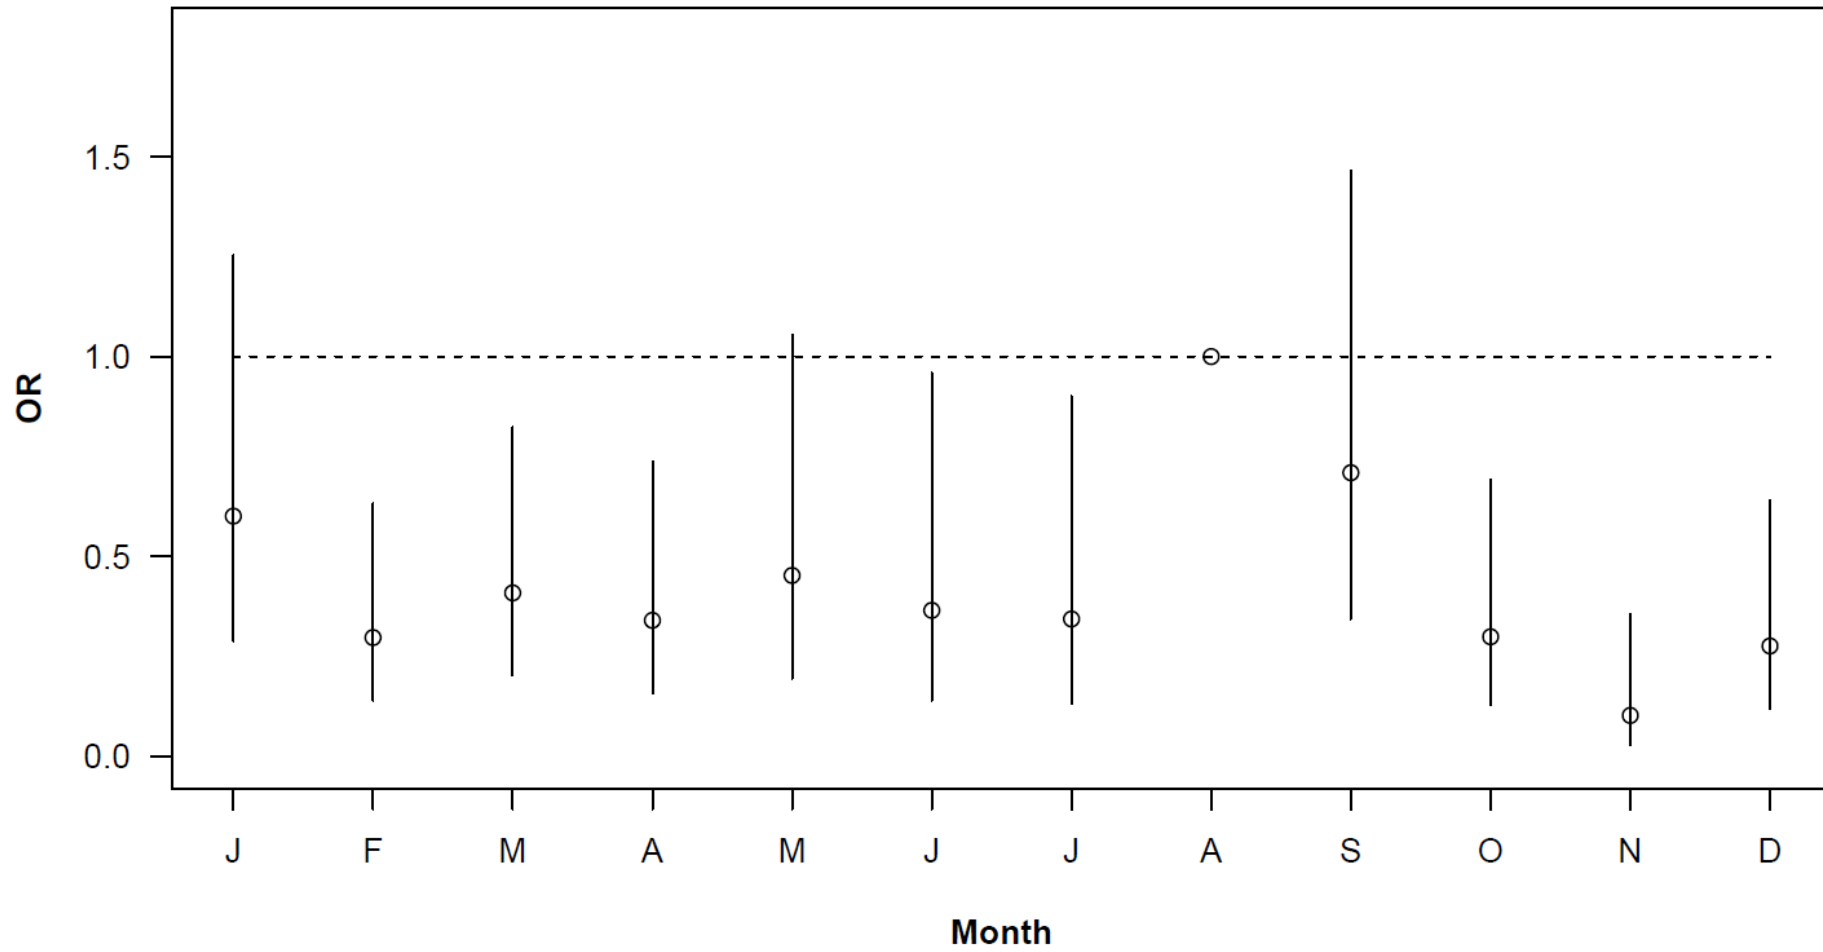

### Chita (Far Eastern)

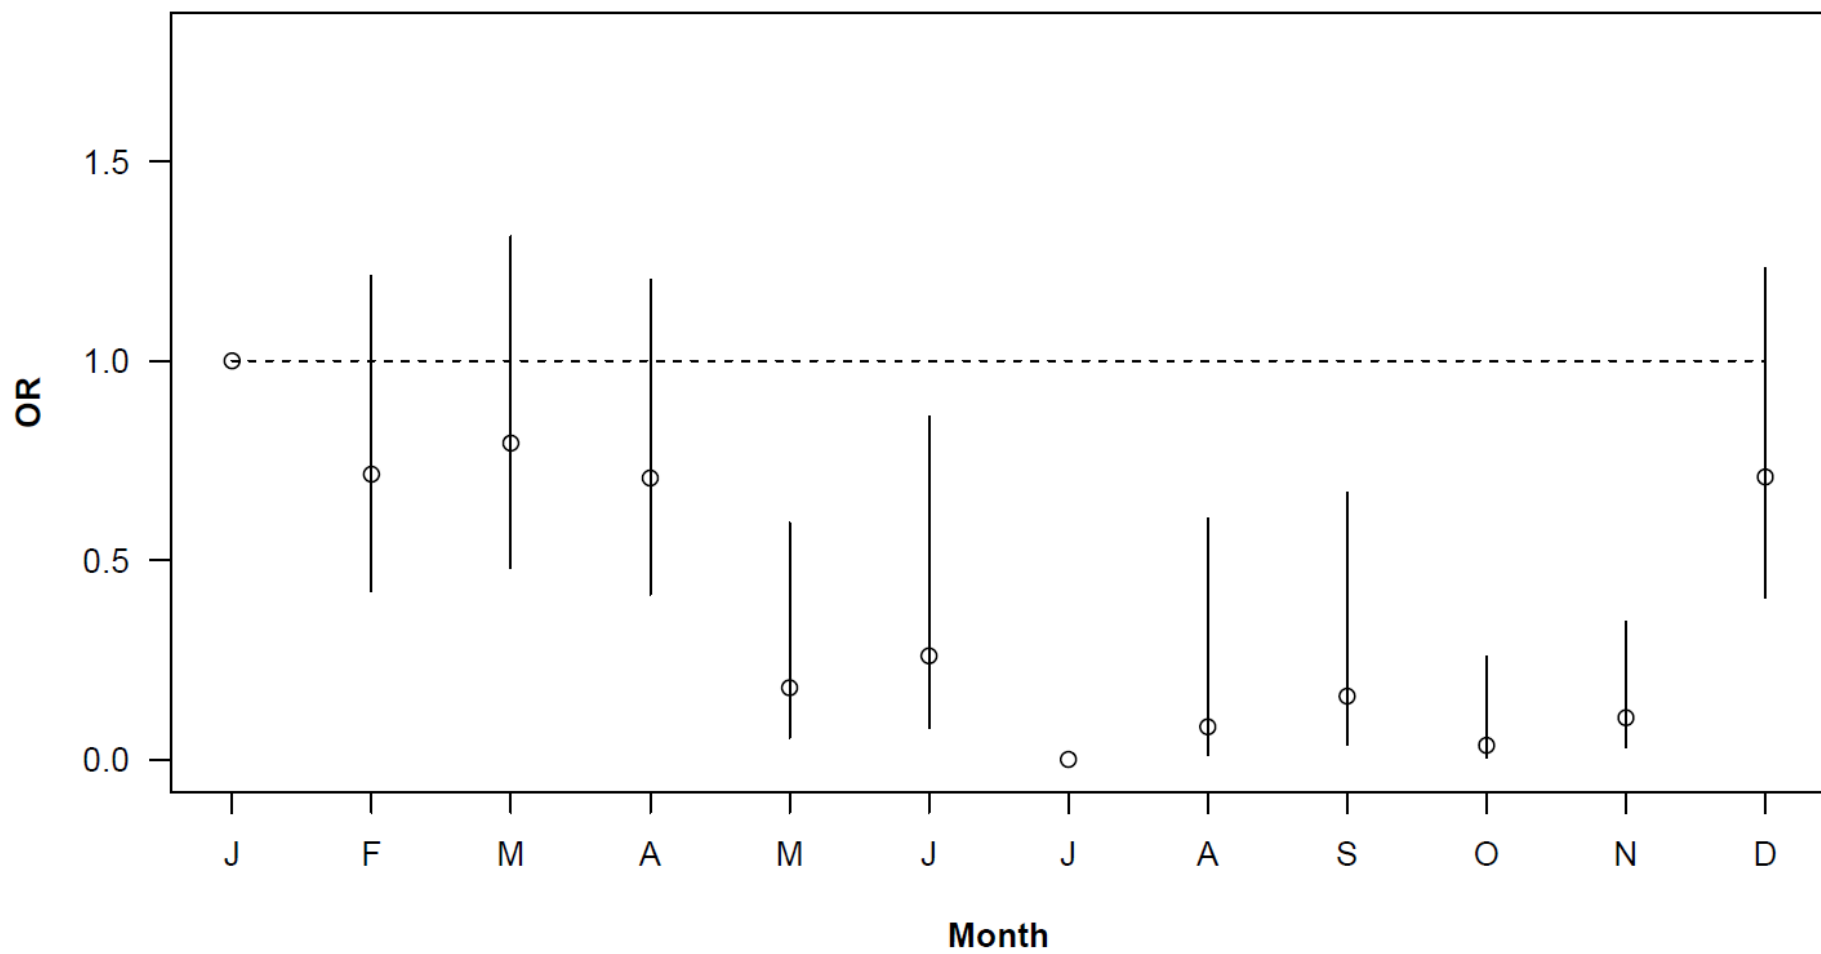

### Vladivostok (Far Eastern)

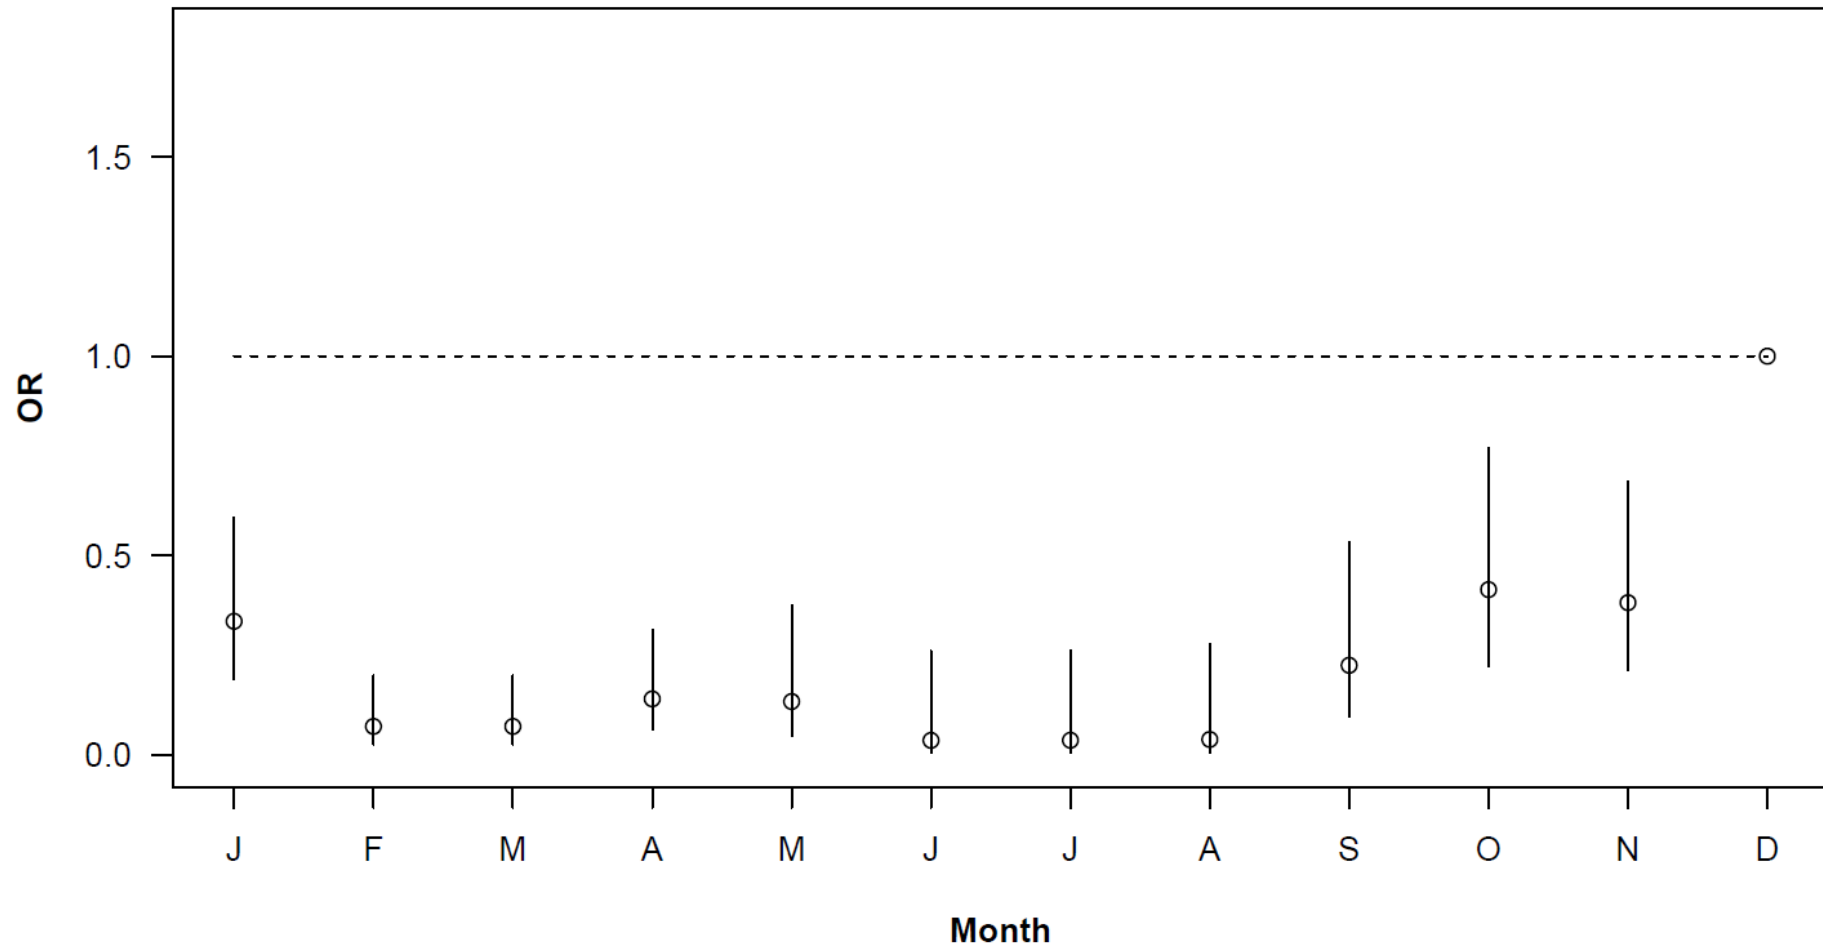

Supplement: jogh-12-04009-s001.pdf [file jogh-12-04009-s001.pdf]
